# Supplementary material for: Rugulopteryx-Derived Spatane, Secospatane, Prenylcubebane and Prenylkelsoane Diterpenoids as Inhibitors of Nitric Oxide Production
Source: MDPI journal article supplement (doi:10.3390/md21040252), 2023-04-19
Supplement: s1 [file s1]

# Rugulopteryx-Derived Spatane, Secospatane, Prenylcubebane and Prenylkelsoane Diterpenoids as Inhibitors of Nitric Oxide Production

Belén Cuevas <sup>1,2</sup>, Ana I. Arroba <sup>2,3</sup>, Carolina de los Reyes <sup>1</sup> and Eva Zubía <sup>1,\*</sup>

<sup>1</sup> Departamento de Química Orgánica, Facultad de Ciencias del Mar y Ambientales, Universidad de Cádiz, 11510 Cádiz, Spain; belen.cuevas@inibica.es (B.C.); carolina.dereyes@uca.es (C.d.l.R.)

<sup>2</sup> Unidad de Investigación, Instituto de Investigación e Innovación Biomédica de Cádiz (INiBICA), Hospital Universitario Puerta del Mar, Avda. Ana de Viya 21, 11009 Cádiz, Spain; anaarroba@gmail.com

<sup>3</sup> Departamento de Biomedicina, Biotecnología y Salud Pública, Facultad de Medicina, Universidad de Cádiz, Pl. Falla, 9, 11003 Cádiz, Spain

\* Correspondence: eva.zubia@uca.es

**Table S1.** <sup>1</sup>H and <sup>13</sup>C NMR data of diterpenoid **7** in CD<sub>3</sub>OD

**Table S2.** <sup>1</sup>H and <sup>13</sup>C NMR data of diterpenoids **9-12** in CD<sub>3</sub>OD

**Table S3.** <sup>1</sup>H and <sup>13</sup>C NMR data of diterpenoid **15** in CD<sub>3</sub>OD

**Figure S1.** <sup>1</sup>H-RMN spectrum (500 MHz, CD<sub>3</sub>OD) of okaspatol A (**1**)

**Figure S2.** <sup>13</sup>C-RMN spectrum (125 MHz, CD<sub>3</sub>OD) of okaspatol A (**1**)

**Figure S3.** <sup>1</sup>H-RMN spectrum (500 MHz, CD<sub>3</sub>OD) of okaspatol B (**2**)

**Figure S4.** <sup>13</sup>C-RMN spectrum (125 MHz, CD<sub>3</sub>OD) of okaspatol B (**2**)

**Figure S5.** <sup>1</sup>H-RMN spectrum (500 MHz, CD<sub>3</sub>OD) of okaspatol C (**3**)

**Figure S6.** <sup>13</sup>C-RMN spectrum (125 MHz, CD<sub>3</sub>OD) of okaspatol C (**3**)

**Figure S7.** <sup>1</sup>H-RMN spectrum (500 MHz, CD<sub>3</sub>OD) of okaspatol D (**4**)

**Figure S8.** <sup>13</sup>C-RMN spectrum (125 MHz, CD<sub>3</sub>OD) of okaspatol D (**4**)

**Figure S9.** <sup>1</sup>H-RMN spectrum (500 MHz, CD<sub>3</sub>OD) of compound **7**

**Figure S10.** <sup>13</sup>C-RMN spectrum (125 MHz, CD<sub>3</sub>OD) of compound **7**

**Figure S11.** <sup>1</sup>H-RMN spectrum (500 MHz, CD<sub>3</sub>OD) of rugukamural D (**8**)

**Figure S12.** <sup>13</sup>C-RMN spectrum (125 MHz, CD<sub>3</sub>OD) of rugukamural D (**8**)

**Figure S13.** <sup>1</sup>H-RMN spectrum (500 MHz, CD<sub>3</sub>OD) of compound **9**

**Figure S14.** <sup>13</sup>C-RMN spectrum (125 MHz, CD<sub>3</sub>OD) of compound **9**

**Figure S15.** <sup>1</sup>H-RMN spectrum (500 MHz, CD<sub>3</sub>OD) of compound **10**

**Figure S16.** <sup>13</sup>C-RMN spectrum (125 MHz, CD<sub>3</sub>OD) of compound **10**

**Figure S17.** <sup>1</sup>H-RMN spectrum (500 MHz, CD<sub>3</sub>OD) of compound **11**

**Figure S18.** <sup>13</sup>C-RMN spectrum (125 MHz, CD<sub>3</sub>OD) of compound **11**

**Figure S19.** <sup>1</sup>H-RMN spectrum (500 MHz, CD<sub>3</sub>OD) of compound **12**

**Figure S20.** <sup>13</sup>C-RMN spectrum (125 MHz, CD<sub>3</sub>OD) of compound **12**

**Figure S21.** <sup>1</sup>H-RMN spectrum (500 MHz, CD<sub>3</sub>OD) of okacubol A (**13**)

**Figure S22.** <sup>13</sup>C-RMN spectrum (125 MHz, CD<sub>3</sub>OD) of okacubol A (**13**)

**Figure S23.** <sup>1</sup>H-RMN spectrum (500 MHz, CD<sub>3</sub>OD) of okacubol B (**14**)

**Figure S24.** <sup>13</sup>C-RMN spectrum (125 MHz, CD<sub>3</sub>OD) of okacubol B (**14**)

**Figure S25.** <sup>1</sup>H-RMN spectrum (500 MHz, CD<sub>3</sub>OD) of compound **15**

**Figure S26.** <sup>13</sup>C-RMN spectrum (125 MHz, CD<sub>3</sub>OD) of compound **15**

**Figure S27.** <sup>1</sup>H-RMN spectrum (500 MHz, CD<sub>3</sub>OD) of okamurol A (**16**)

**Figure S28.** <sup>13</sup>C-RMN spectrum (125 MHz, CD<sub>3</sub>OD) of okamurol A (**16**)

**Figure S29.** Key COSY and HMBC correlations observed for compounds **2-4**, **7**, **9-12**, **14**, and **15**

**Figure S30.** Key NOESY correlations observed for compounds **2-4**, **7**, **9-12**, **14**, and **15**

**Figure S31.** Cell survival of Bv.2 cells

**Figure S32.** Cell survival of RAW 264.7 cells

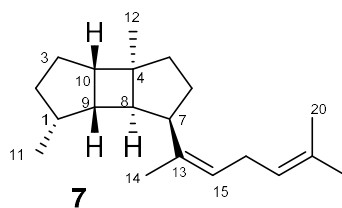

**Table S1.** NMR data of diterpenoid **7** in CD<sub>3</sub>OD<sup>a,b</sup>

|    | $\delta_C$ , Type     | $\delta_H$ , m (J in Hz)        |
|----|-----------------------|---------------------------------|
| 1  | 38.1, CH              | 1.79, m                         |
| 2  | 35.4, CH <sub>2</sub> | 1.70, m                         |
|    |                       | 1.29, dddd (12.2,12.2,12.2,6.3) |
| 3  | 29.1, CH <sub>2</sub> | 1.70, m                         |
|    |                       | 1.46, m                         |
| 4  | 42.9, C               |                                 |
| 5  | 43.1, CH <sub>2</sub> | 1.64, m                         |
|    |                       | 1.43, m                         |
| 6  | 29.8, CH <sub>2</sub> | 2.17, m                         |
|    |                       | 1.70, m                         |
| 7  | 45.8, CH              | 2.80, ddd (12.8,5.8,5.8)        |
| 8  | 48.2, CH              | 1.96, br d (5.8, 4.7)           |
| 9  | 41.3, CH              | 2.29, ddd (7.0,7.0,4.7)         |
| 10 | 47.0, CH              | 2.11, m                         |
| 11 | 14.2, CH <sub>3</sub> | 0.85, d (6.7)                   |
| 12 | 20.8, CH <sub>3</sub> | 0.93, s                         |
| 13 | 136.3, C              |                                 |
| 14 | 24.4, CH <sub>3</sub> | 1.77, br s                      |
| 15 | 126.2, CH             | 5.13, br t (7.2)                |
| 16 | 27.8, CH <sub>2</sub> | 2.67, m                         |
| 17 | 124.8, CH             | 5.06, br t (7.2)                |
| 18 | 131.6, C              |                                 |
| 19 | 25.9, CH <sub>3</sub> | 1.66, br s                      |
| 20 | 17.8, CH <sub>3</sub> | 1.61, br s                      |

<sup>a</sup> <sup>1</sup>H at 500 MHz, <sup>13</sup>C at 125 MHz; <sup>b</sup> Assignments aided by COSY, HSQC, HMBC, and NOESY experiments.

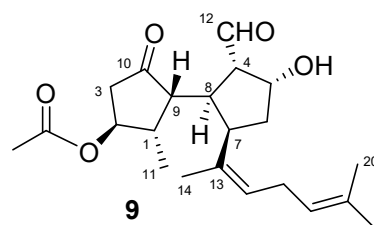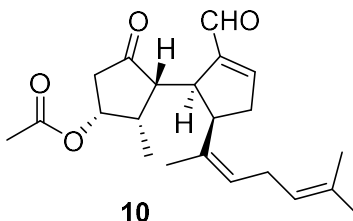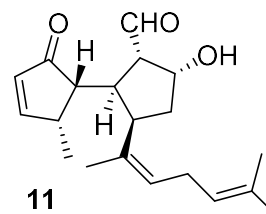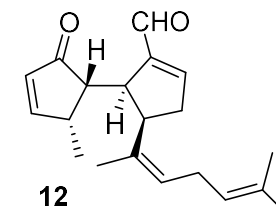

Table S2. NMR data of diterpenoids 9-12 in CD<sub>3</sub>OD<sup>a,b</sup>.

| Position            | 9                     |                                       | 10                    |                                       | 11                    |                                                      | 12                    |                                                 |
|---------------------|-----------------------|---------------------------------------|-----------------------|---------------------------------------|-----------------------|------------------------------------------------------|-----------------------|-------------------------------------------------|
|                     | $\delta_C$ , Type     | $\delta_H$ , m (J in Hz)              | $\delta_C$ , Type     | $\delta_H$ , m (J in Hz)              | $\delta_C$ , Type     | $\delta_H$ , m (J in Hz)                             | $\delta_C$ , Type     | $\delta_H$ , m (J in Hz)                        |
| 1                   | 41.1, CH              | 2.63, m                               | 41.7, CH              | 2.57, m                               | 41.8, CH              | 3.07, m                                              | 42.1, CH              | 3.07, m                                         |
| 2                   | 76.8, CH              | 5.03, br d (6.2)                      | 77.5, CH              | 5.07, m                               | 170.7, CH             | 7.72, dd (5.8,3.0)                                   | 171.1, CH             | 7.66, dd (5.7,2.6)                              |
| 3                   | 42.2, CH <sub>2</sub> | 2.56, dd (19.6,6.2)<br>2.25, d (19.6) | 43.0, CH <sub>2</sub> | 2.60, dd (19.1,6.2)<br>2.14, d (19.1) | 132.4, CH             | 5.97, dd (5.8,1.6)                                   | 132.3, CH             | 5.90, dd (5.7,1.8)                              |
| 4                   | 61.3, CH              | 3.20, ddd (9.8,6.3,2.6)               | 149.9, C              |                                       | 60.5, CH              | 3.49, ddd (10.6,6.5,2.0)                             | 149.7, C              |                                                 |
| 5                   | 75.9, CH              | 4.77, ddd (6.3,6.1,3.4)               | 152.9, CH             | 7.01, br s                            | 75.2, CH              | 4.82, <sup>c</sup>                                   | 155.4, CH             | 7.06, br s                                      |
| 6                   | 40.8, CH <sub>2</sub> | 2.00, m<br>1.78, m                    | 36.3, CH <sub>2</sub> | 2.75, m<br>2.57, m                    | 40.5, CH <sub>2</sub> | 2.15, ddd (14.1,6.1,6.1)<br>1.79, ddd (14.1,8.5,3.0) | 36.6, CH <sub>2</sub> | 2.89, dd (18.7,8.6)<br>2.55, ddd (18.7,8.6,3.1) |
| 7                   | 41.5, CH              | 3.61, m                               | 46.3, CH              | 3.55, ddd (8.0,8.0,8.0)               | 41.9, CH              | 3.66, ddd (8.7,8.5,6.1)                              | 46.3, CH              | 3.62, ddd (8.6,8.6,8.6)                         |
| 8                   | 38.2, CH              | 2.98, ddd (9.8,9.8,9.3)               | 41.9, CH              | 3.28, <sup>c</sup>                    | 38.7, CH              | 3.05, m                                              | 42.9, CH              | 3.32, m                                         |
| 9                   | 52.3, CH              | 2.55, m                               | 49.8, CH              | 2.70, m                               | 50.0, CH              | 2.31, dd (8.8,6.0)                                   | 48.7, CH              | 2.63, dd (6.2,3.4)                              |
| 10                  | 218.1, C              |                                       | 216.9, C              |                                       | 213.3, C              |                                                      | 212.9, C              |                                                 |
| 11                  | 13.9, CH <sub>3</sub> | 1.00, d (7.4)                         | 14.0, CH <sub>3</sub> | 1.15, d (7.4)                         | 17.6, CH <sub>3</sub> | 1.20, d (7.3)                                        | 16.0, CH <sub>3</sub> | 1.33, d (7.5)                                   |
| 12                  | 204.7, CH             | 9.66, d (2.6)                         | 191.5, CH             | 9.61, s                               | 203.8, CH             | 9.65, d (2.0)                                        | 191.6, CH             | 9.55, s                                         |
| 13                  | 136.2, C              |                                       | 135.4, C              |                                       | 136.2, C              |                                                      | 135.7, C              |                                                 |
| 14                  | 22.4, CH <sub>3</sub> | 1.64, br s                            | 22.7, CH <sub>3</sub> | 1.74, br s                            | 22.2, CH <sub>3</sub> | 1.64, d (1.3)                                        | 22.5, CH <sub>3</sub> | 1.79, br s                                      |
| 15                  | 129.5, CH             | 5.22, br t (7.4)                      | 130.0, CH             | 5.33, br t (7.2)                      | 129.6, CH             | 5.27, br t (7.1)                                     | 129.7, CH             | 5.38, br t (7.3)                                |
| 16                  | 28.1, CH <sub>2</sub> | 2.79, m<br>2.72, m                    | 28.0, CH <sub>2</sub> | 2.73, m                               | 28.1, CH <sub>2</sub> | 2.82, m<br>2.75, m                                   | 28.1, CH <sub>2</sub> | 2.78, m<br>2.70, m                              |
| 17                  | 123.8, CH             | 5.06, br t (7.3)                      | 123.8, CH             | 5.07, m                               | 124.0, CH             | 5.07, br t (7.1)                                     | 123.8, CH             | 5.08, br t (7.0)                                |
| 18                  | 132.8, C              |                                       | 132.8, C              |                                       | 132.7, C              |                                                      | 132.7, C              |                                                 |
| 19                  | 25.9, CH <sub>3</sub> | 1.69, d (1.1)                         | 25.9, CH <sub>3</sub> | 1.68, br s                            | 25.9, CH <sub>3</sub> | 1.69, br s                                           | 25.9, CH <sub>3</sub> | 1.68, br s                                      |
| 20                  | 17.9, CH <sub>3</sub> | 1.64, br s                            | 17.9, CH <sub>3</sub> | 1.62, br s                            | 17.9, CH <sub>3</sub> | 1.65, br s                                           | 17.9, CH <sub>3</sub> | 1.63, br s                                      |
| CH <sub>3</sub> COO | 172.0, C              |                                       | 172.1, C              |                                       |                       |                                                      |                       |                                                 |
| CH <sub>3</sub> COO | 21.0, CH <sub>3</sub> | 2.01, s                               | 21.0, CH <sub>3</sub> | 2.01, s                               |                       |                                                      |                       |                                                 |

<sup>a</sup> <sup>1</sup>H at 500 MHz, <sup>13</sup>C at 125 MHz; <sup>b</sup> Assignments aided by COSY, HSQC, HMBC, and NOESY experiments; <sup>c</sup> Obscured by solvent signals

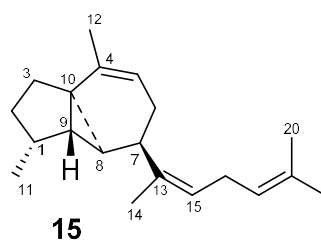

**Table S3.** NMR data of diterpenoid **15** in CD<sub>3</sub>OD<sup>a,b</sup>

| Position | $\delta_C$ , Type     | $\delta_H$ , m (J in Hz)  |
|----------|-----------------------|---------------------------|
| 1        | 35.8, CH              | 2.29, m                   |
| 2        | 30.8, CH <sub>2</sub> | 1.65, m                   |
| 3        | 30.7, CH <sub>2</sub> | 0.87, m                   |
| 4        | 137.8, C              | 2.09, ddd (12.1,11.7,8.3) |
| 5        | 118.2, CH             | 1.74, m                   |
| 6        | 27.4, CH <sub>2</sub> | 5.24, br d (6.9)          |
| 7        | 33.5, CH              | 1.78, m                   |
| 8        | 24.6, CH              | 1.62, m                   |
| 9        | 34.8, CH              | 2.82, ddd (12.6,5.5,3.5)  |
| 10       | 31.9, C               | 0.95, m                   |
| 11       | 18.2, CH <sub>3</sub> | 1.62, m                   |
| 12       | 21.7, CH <sub>3</sub> | 1.00, d (6.6)             |
| 13       | 140.2, C              | 1.82, br s                |
| 14       | 20.3, CH <sub>3</sub> | 1.71, br s                |
| 15       | 124.66, CH            | 5.13, br t (7.3)          |
| 16       | 27.3, CH <sub>2</sub> | 2.70, m                   |
| 17       | 124.74, CH            | 5.07, br t (7.2)          |
| 18       | 131.8, C              |                           |
| 19       | 25.9, CH <sub>3</sub> | 1.69, br d (1.1)          |
| 20       | 17.8, CH <sub>3</sub> | 1.61, br s                |

<sup>a</sup> <sup>1</sup>H at 500 MHz, <sup>13</sup>C at 125 MHz; <sup>b</sup> Assignments aided by COSY, HSQC, HMBC, and NOESY experiments.

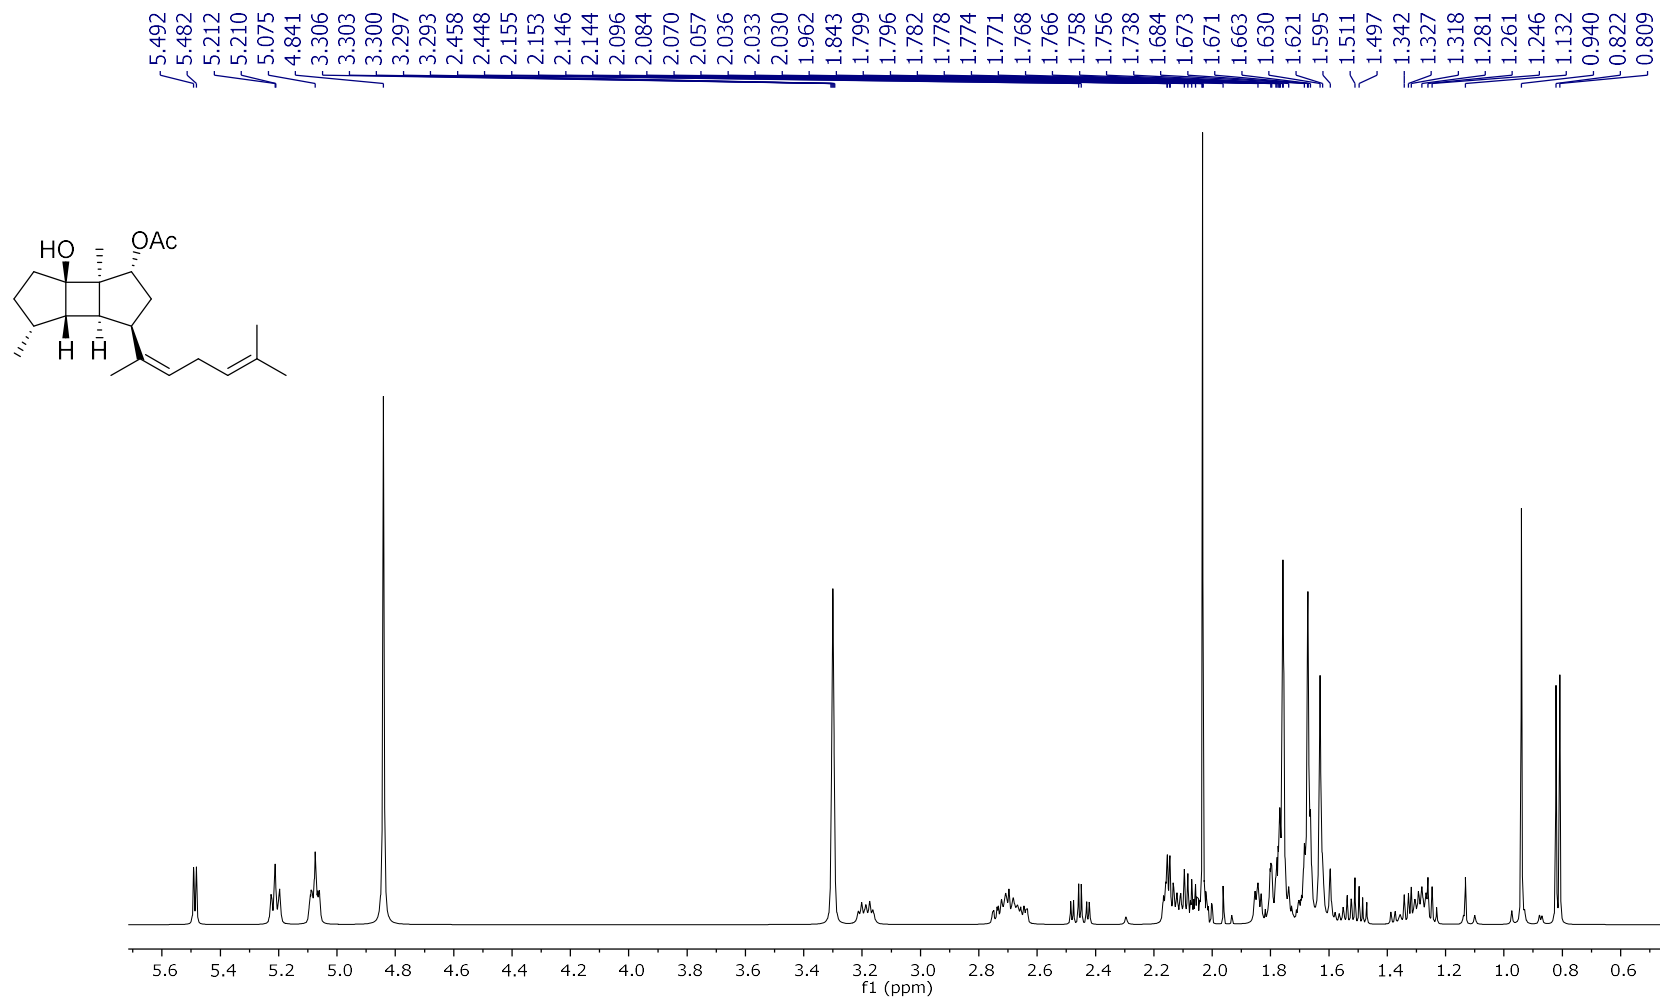

**Figure S1.** <sup>1</sup>H RMN spectrum (500 MHz, CD<sub>3</sub>OD) of okaspatol A (1)

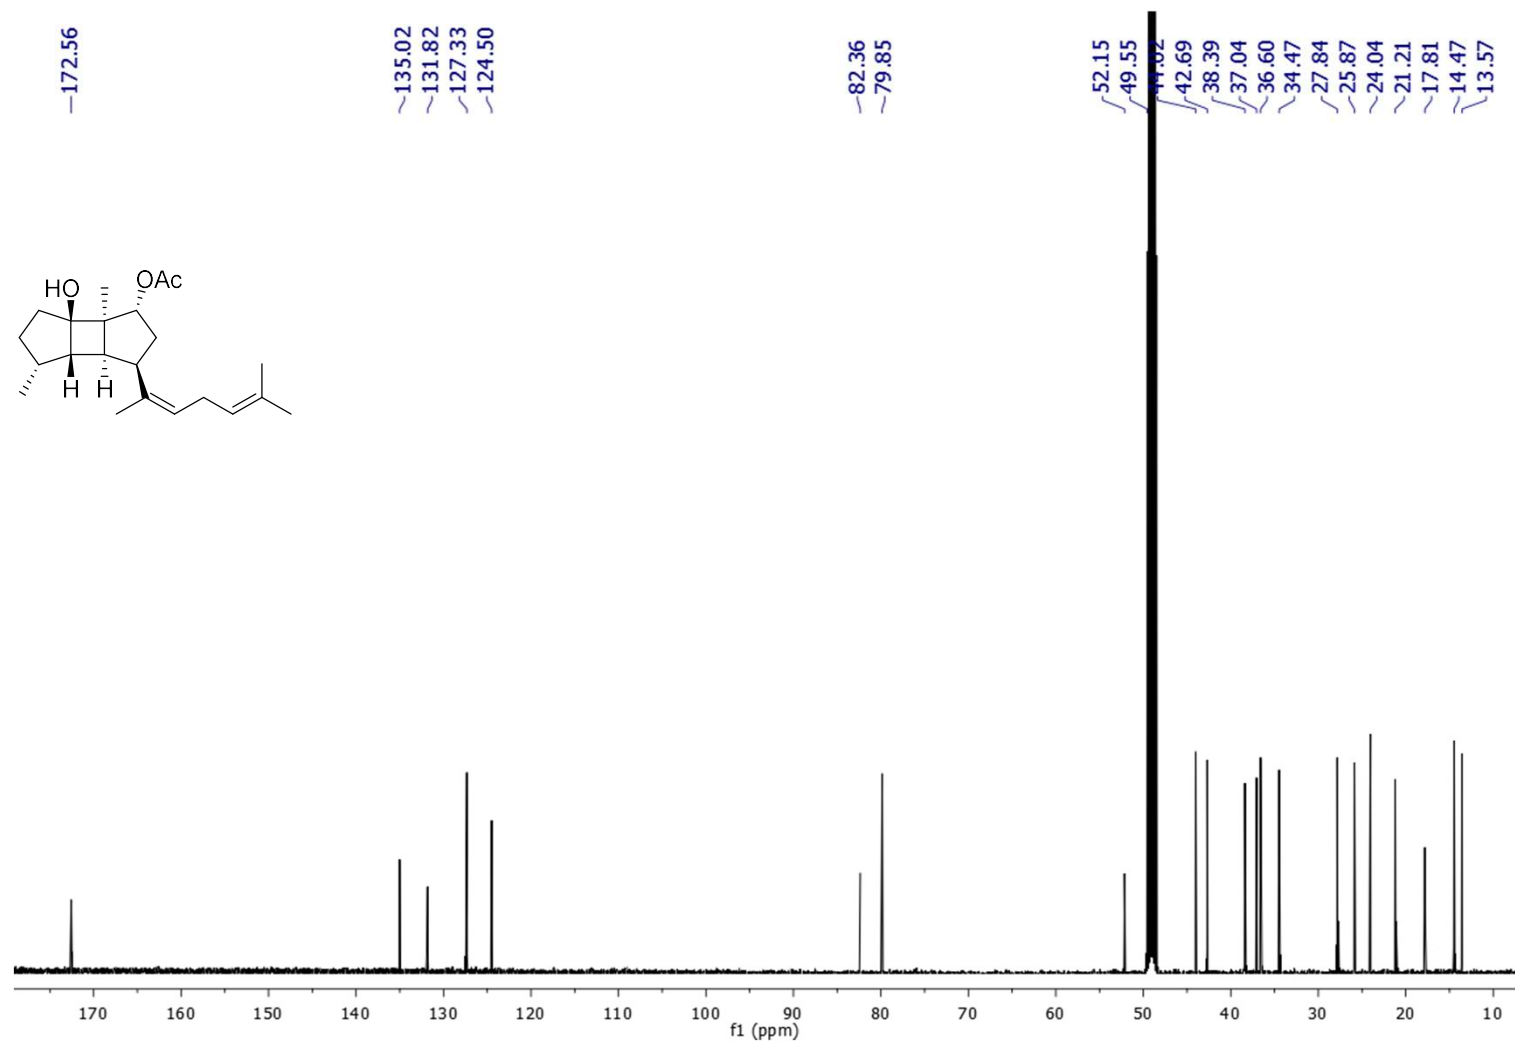

Figure S2. <sup>13</sup>C RMN spectrum (125 MHz, CD<sub>3</sub>OD) of okaspatol A (1)

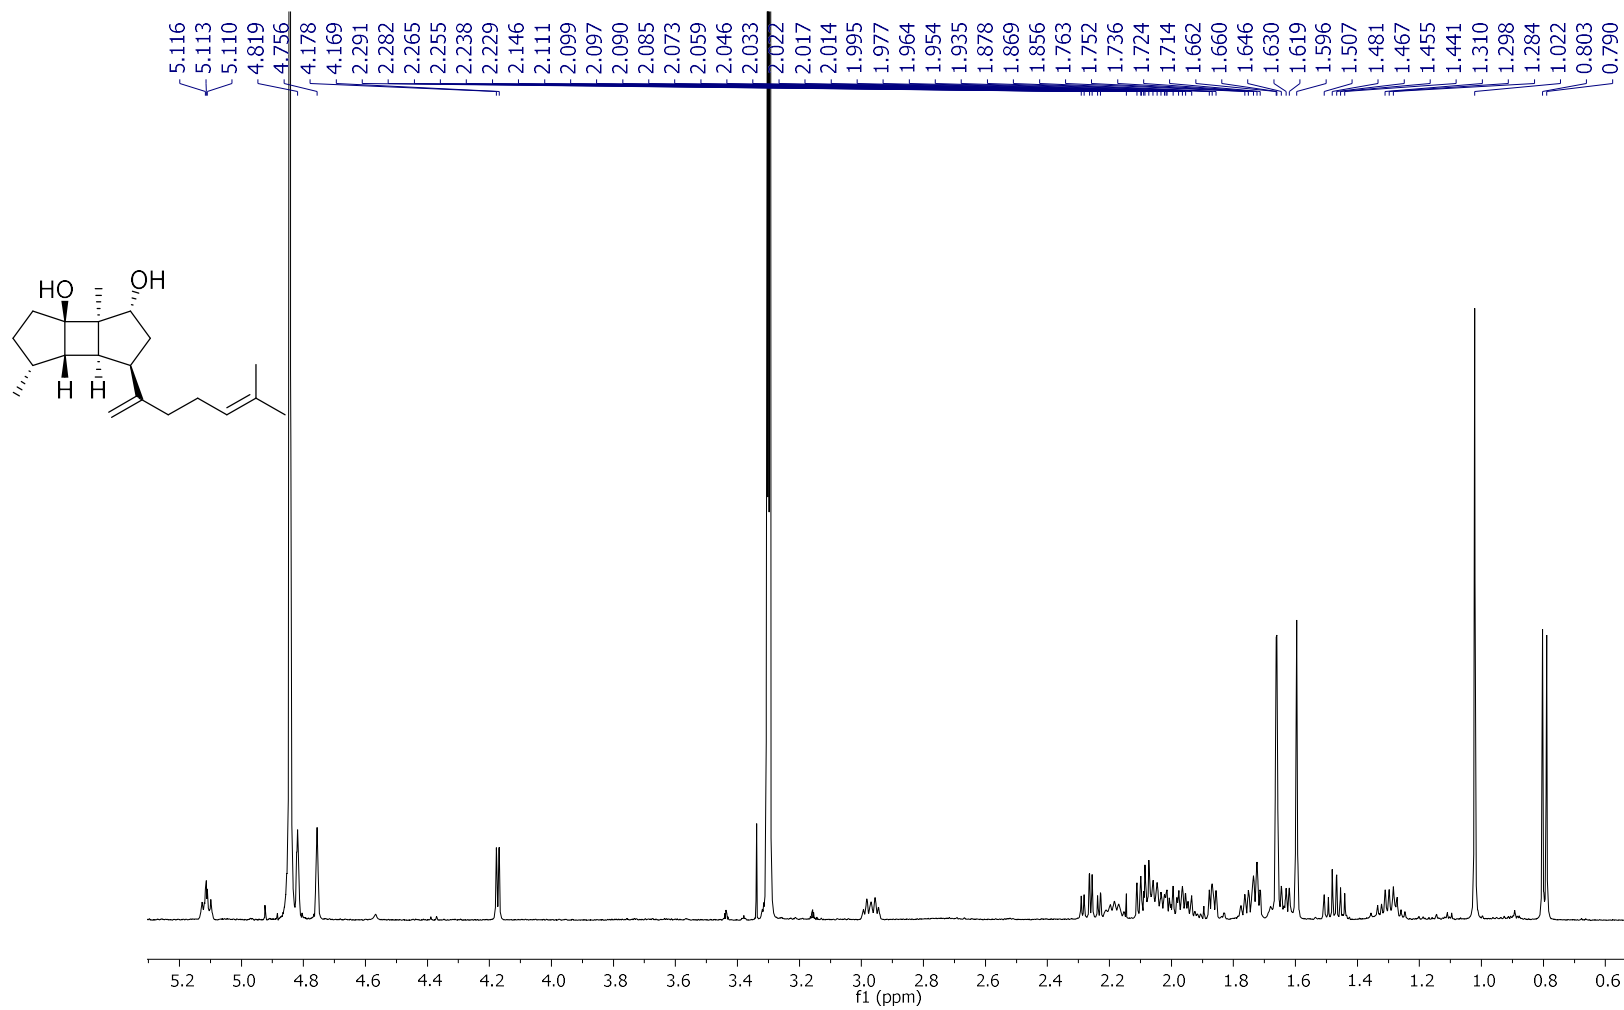

**Figure S3.** <sup>1</sup>H RMN spectrum (500 MHz, CD<sub>3</sub>OD) of okaspatol B (2)

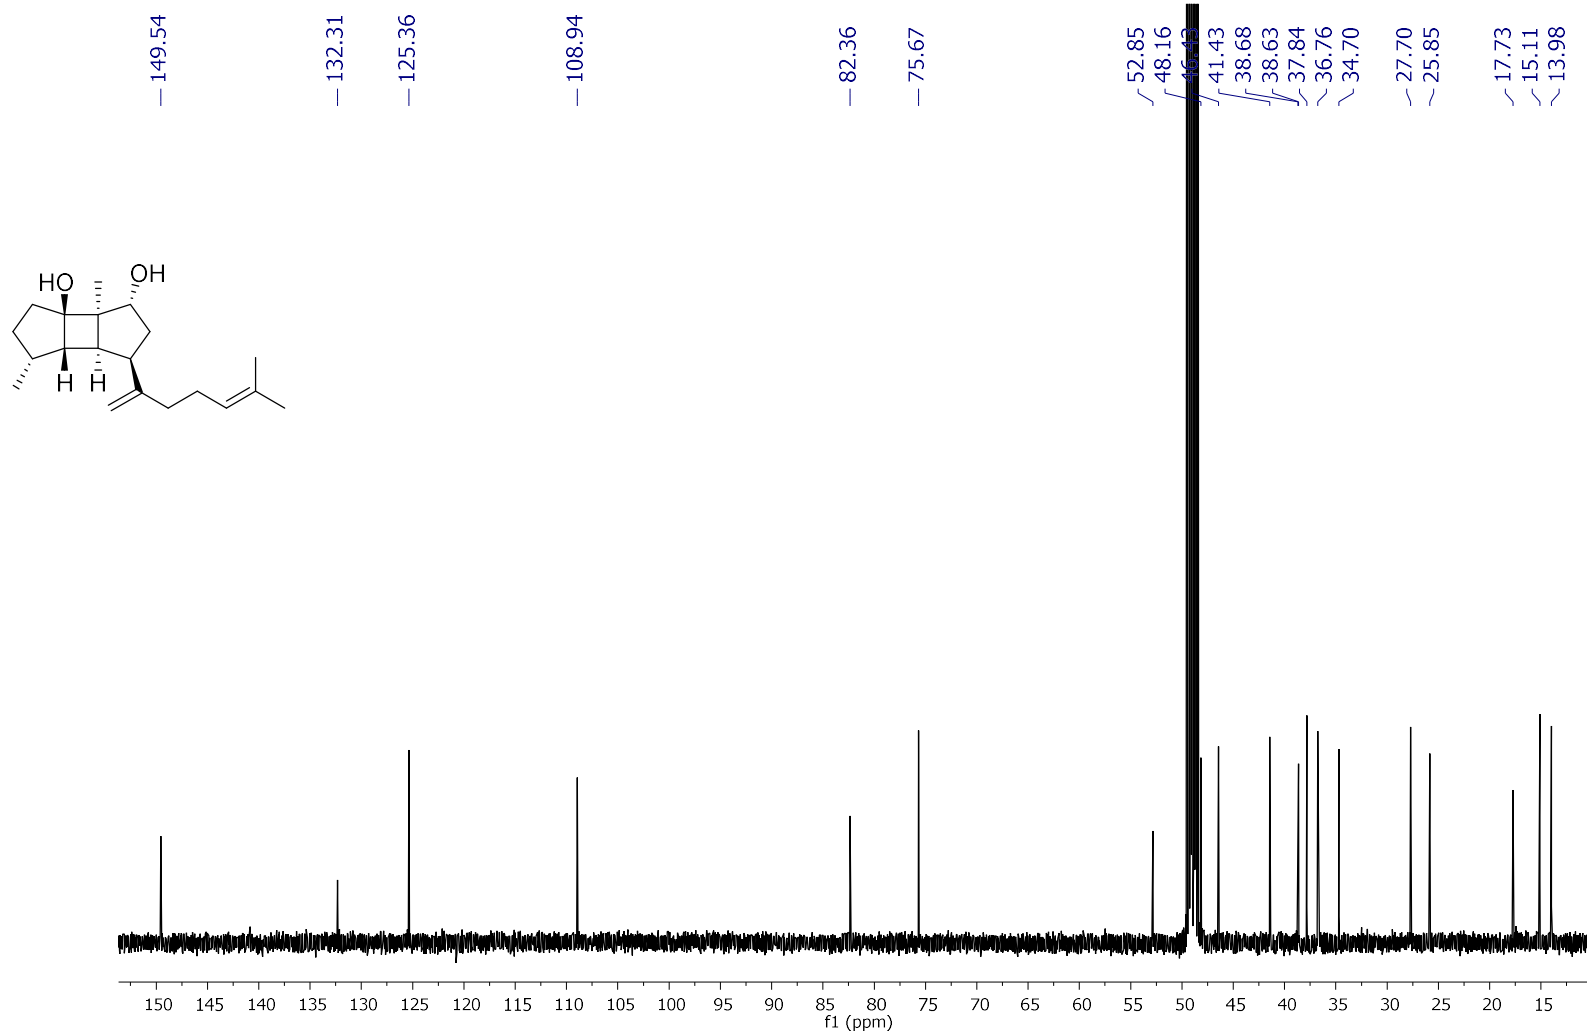

Figure S4.  $^{13}\text{C}$  RMN spectrum (125 MHz,  $\text{CD}_3\text{OD}$ ) of okaspatol B (2)



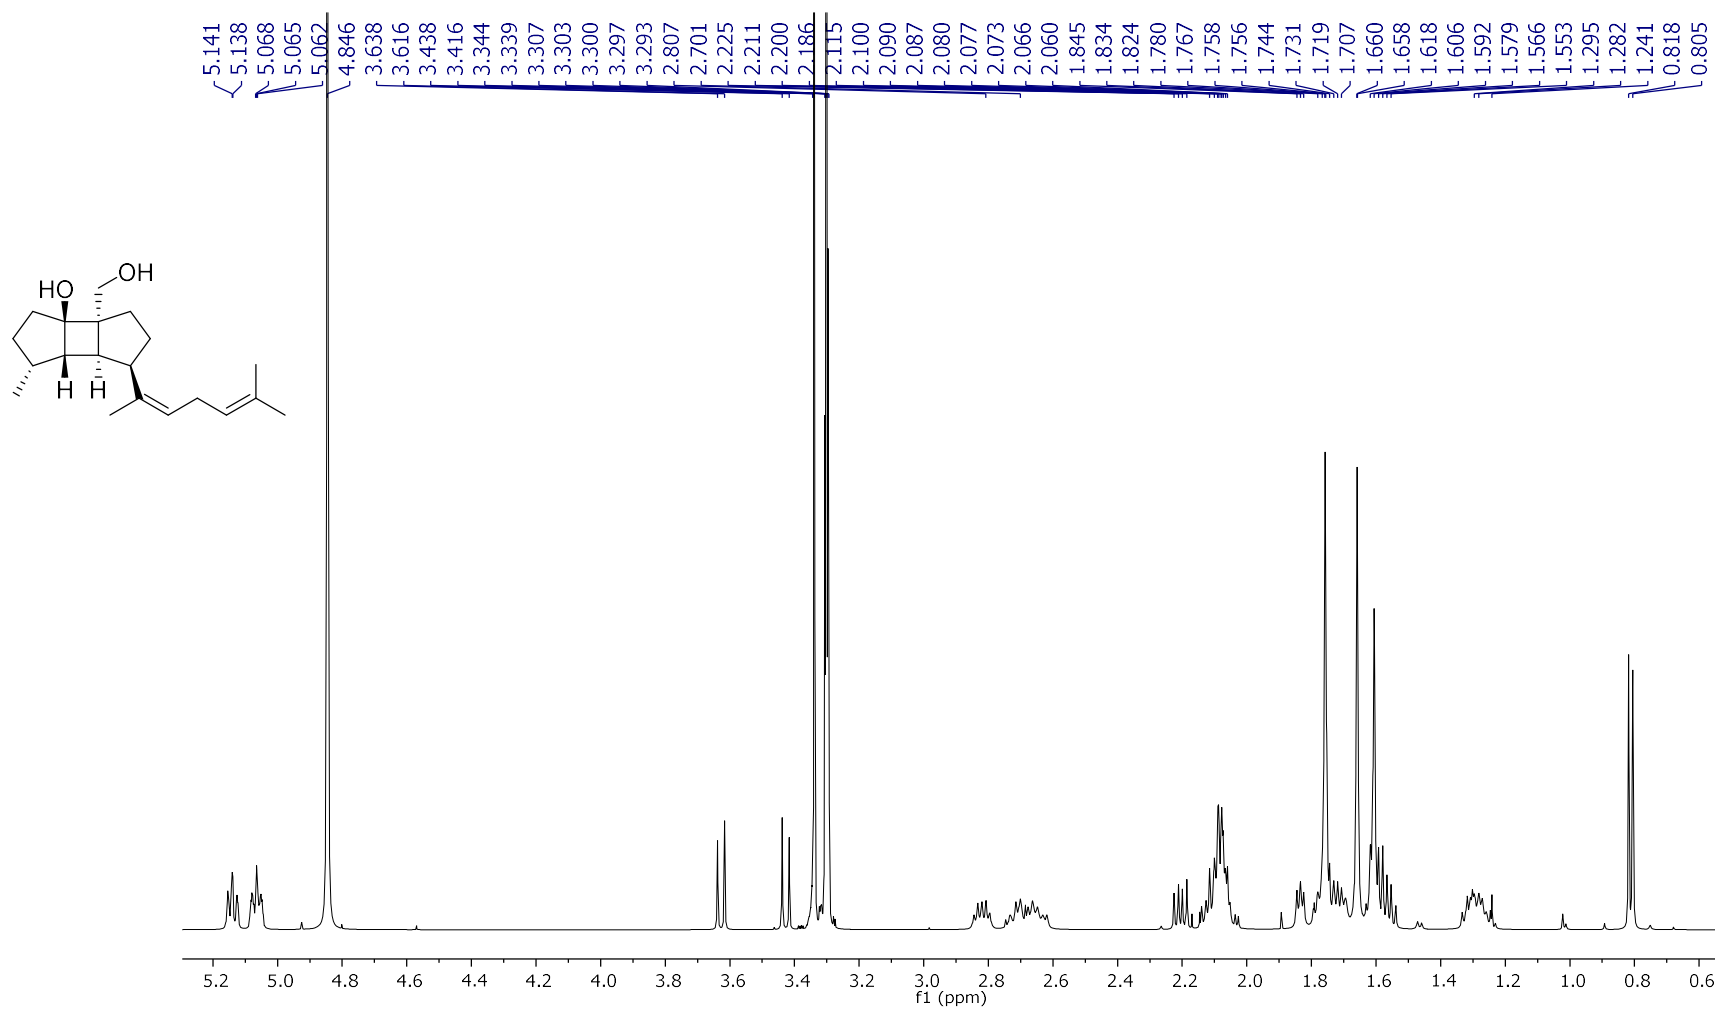

**Figure S5.** <sup>1</sup>H RMN spectrum (500 MHz, CD<sub>3</sub>OD) of okaspatol C (3)

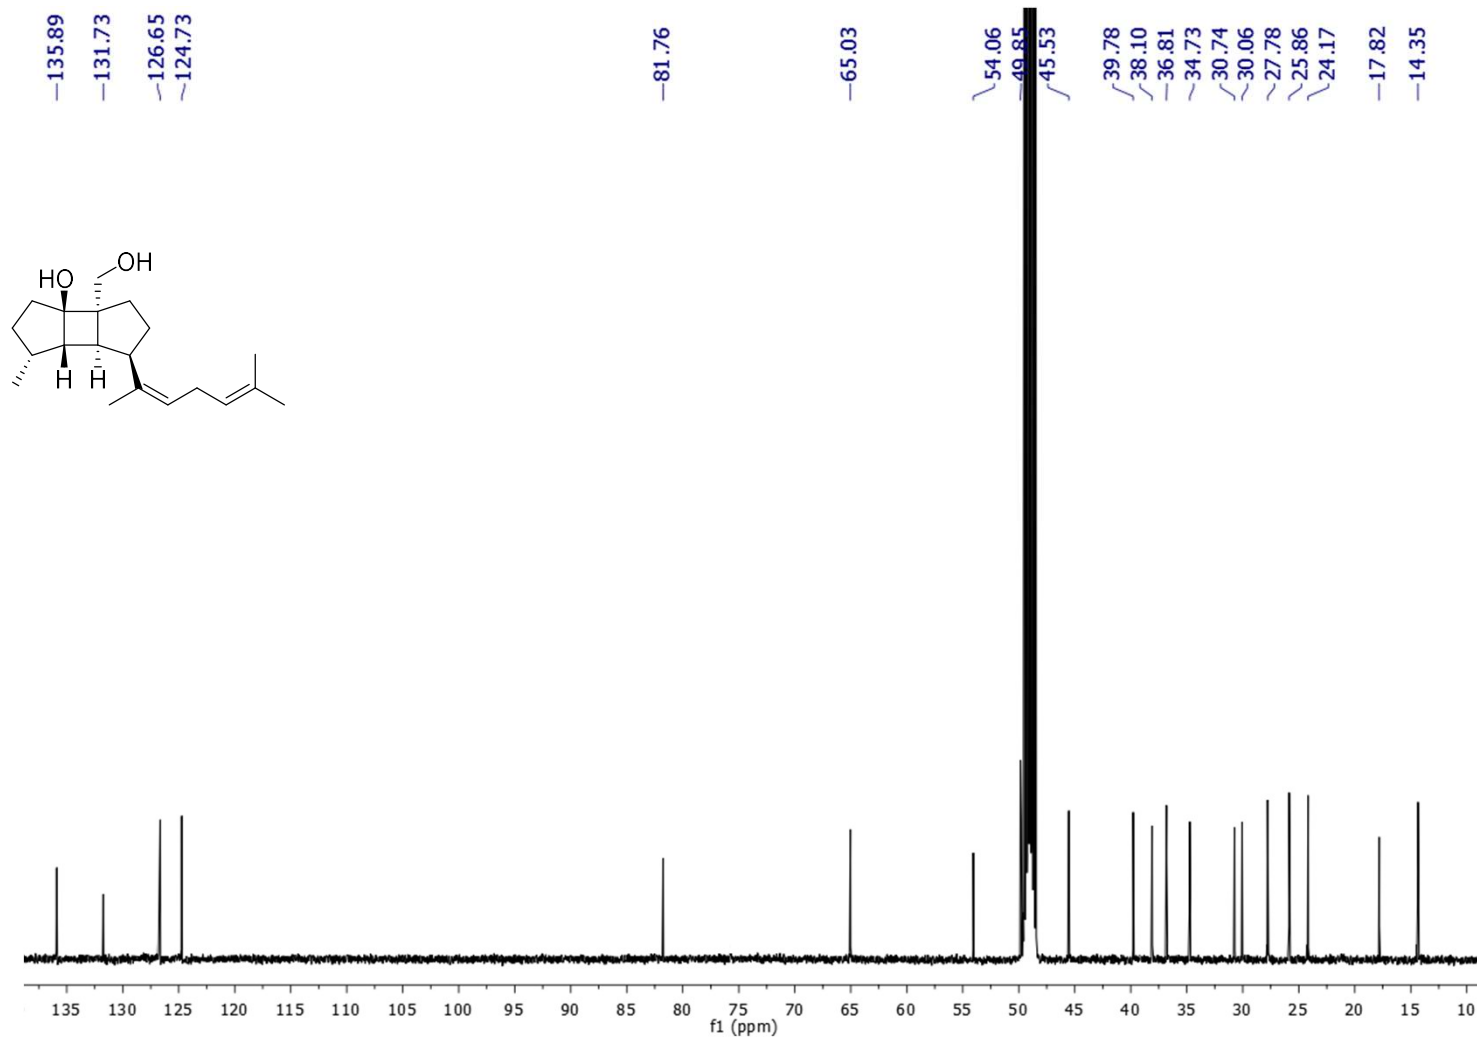

Figure S6. <sup>13</sup>C RMN spectrum (125 MHz, CD<sub>3</sub>OD) of okaspatol C (3)

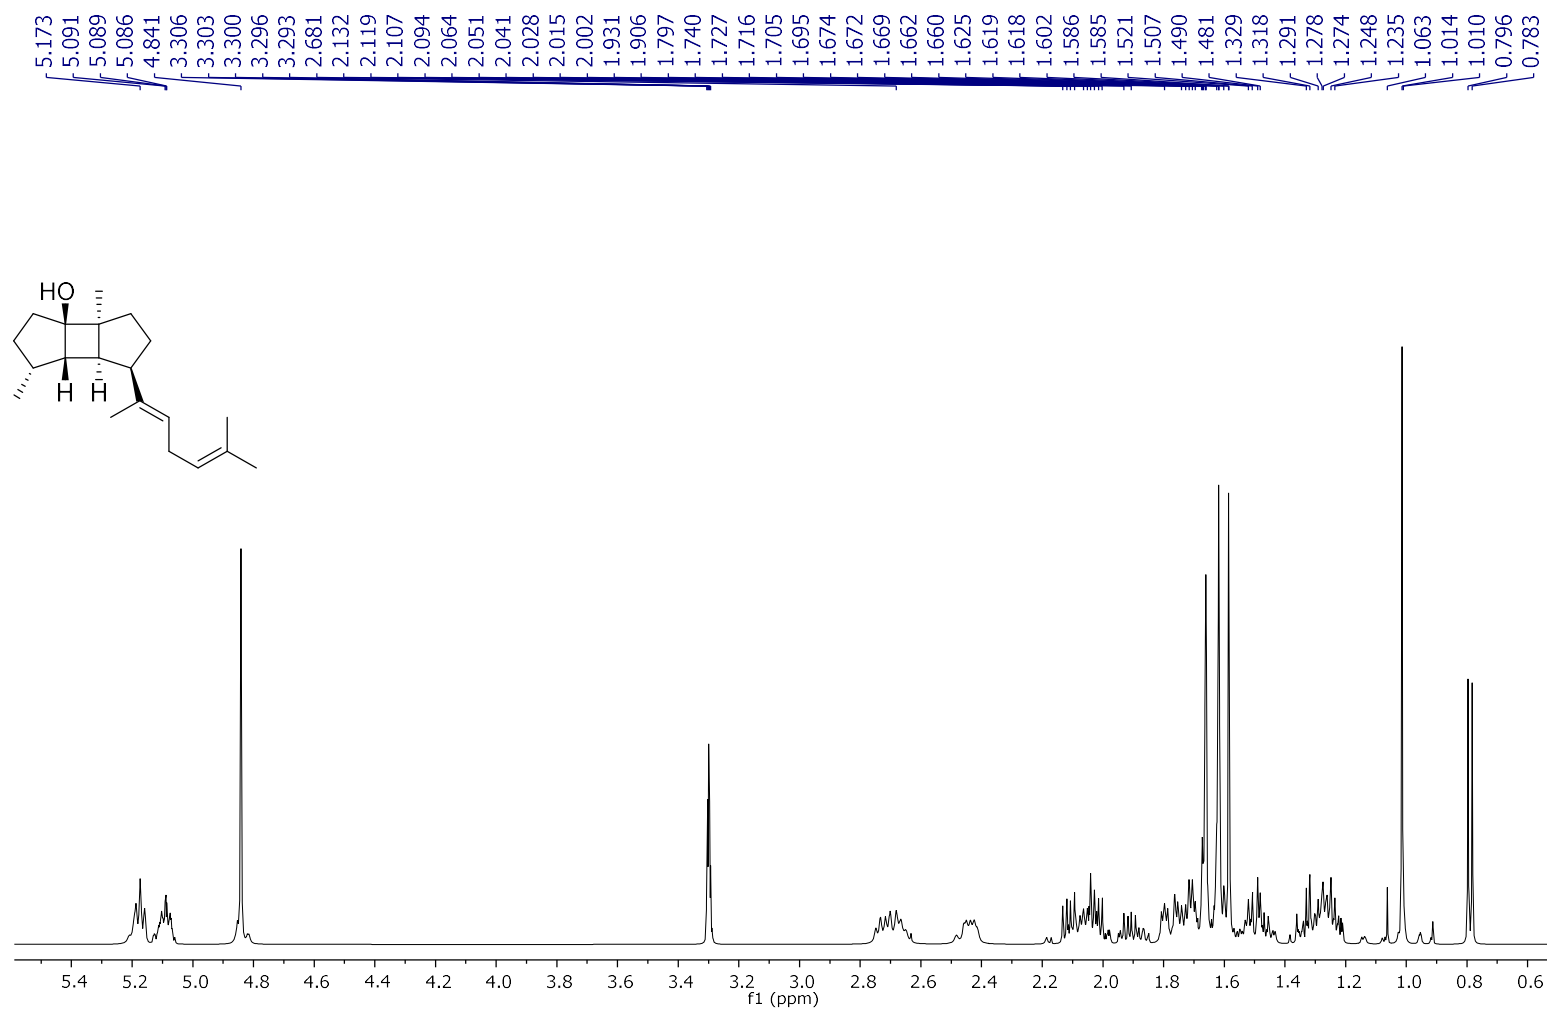

**Figure S7.** <sup>1</sup>H RMN spectrum (500 MHz, CD<sub>3</sub>OD) of okaspatol D (4)



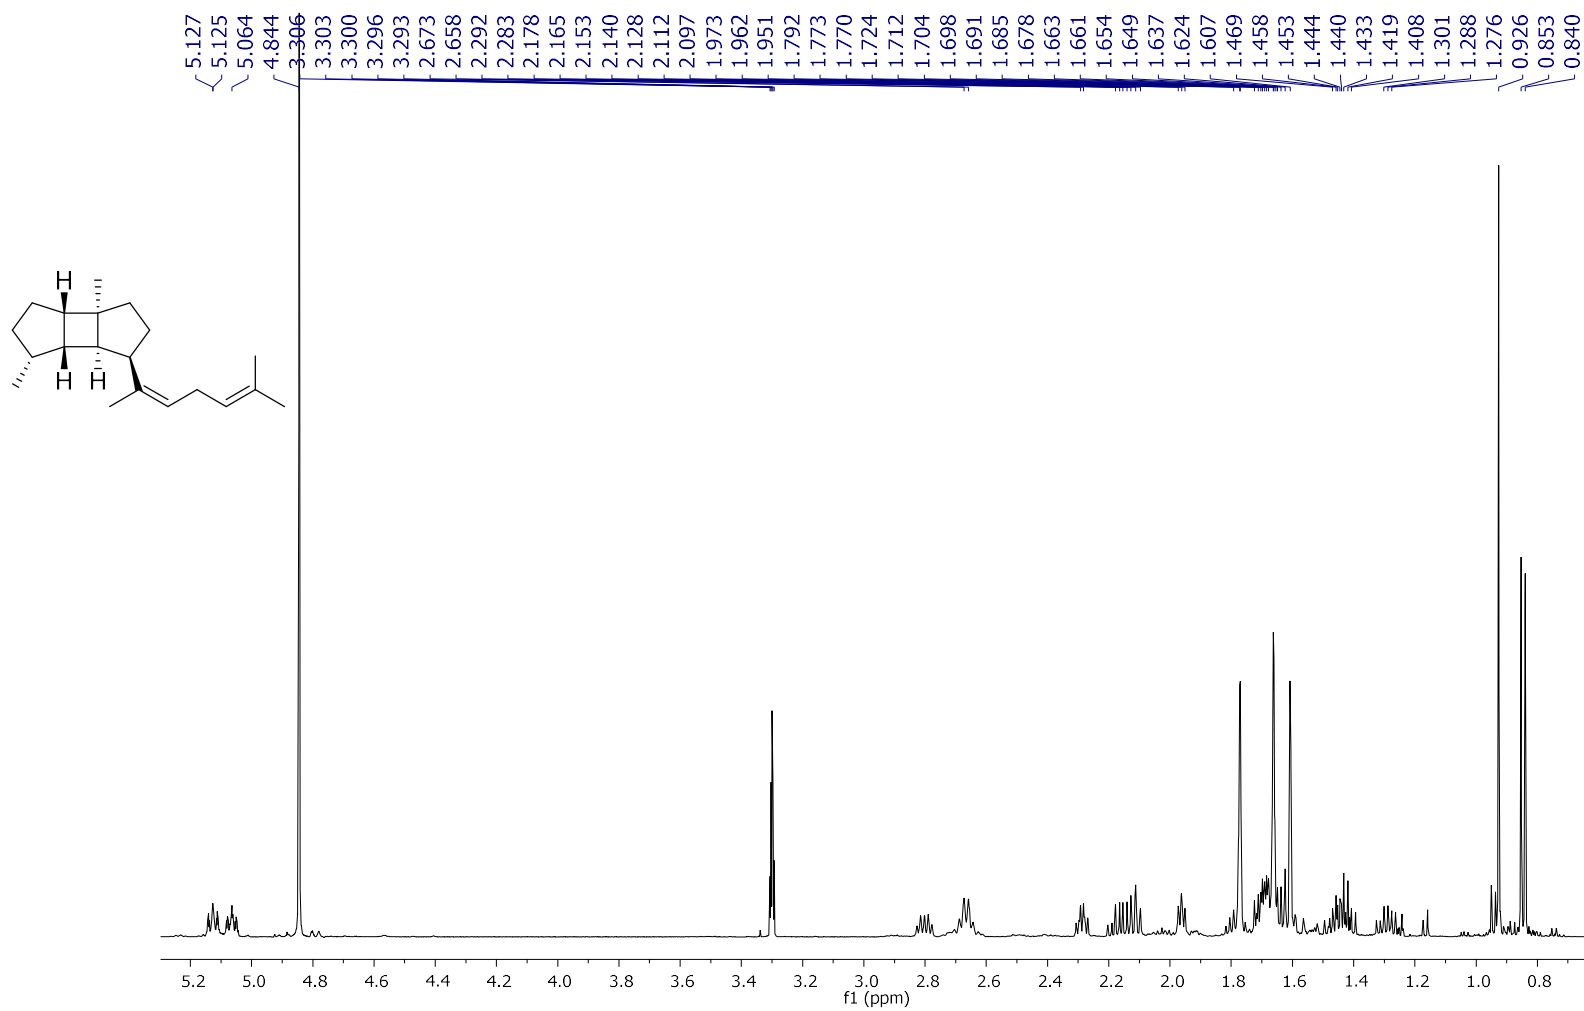

**Figure S9.** <sup>1</sup>H RMN spectrum (500 MHz, CD<sub>3</sub>OD) of compound 7

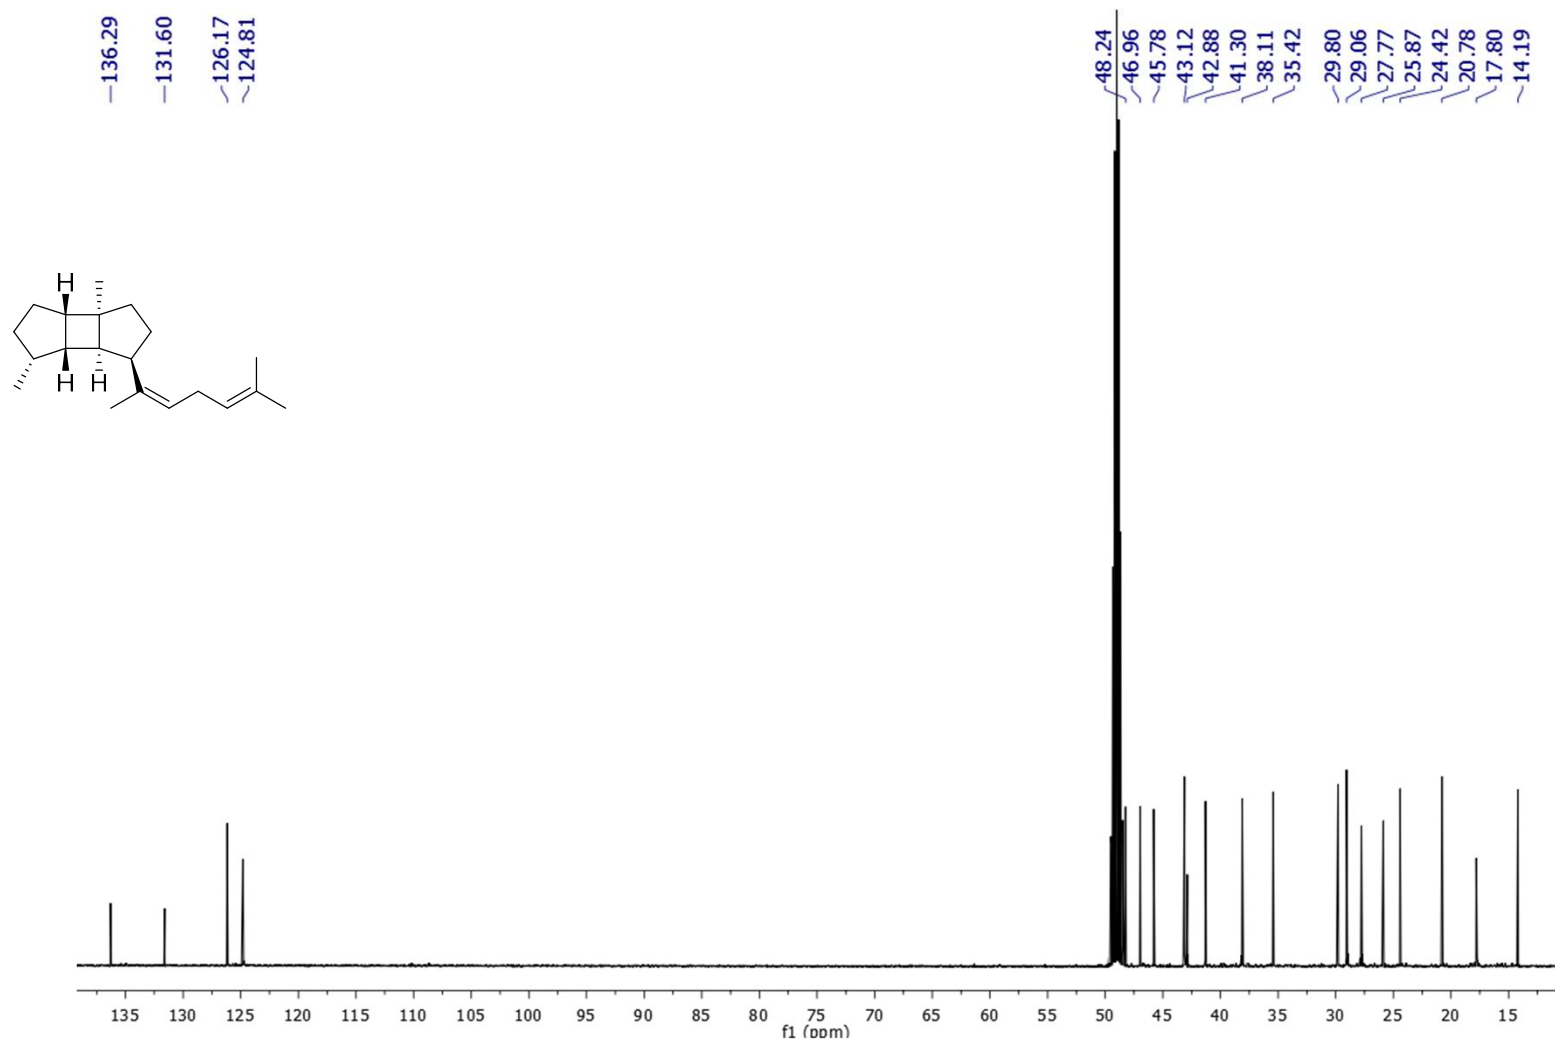

Figure S10. <sup>13</sup>C RMN spectrum (125 MHz, CD<sub>3</sub>OD) of compound 7

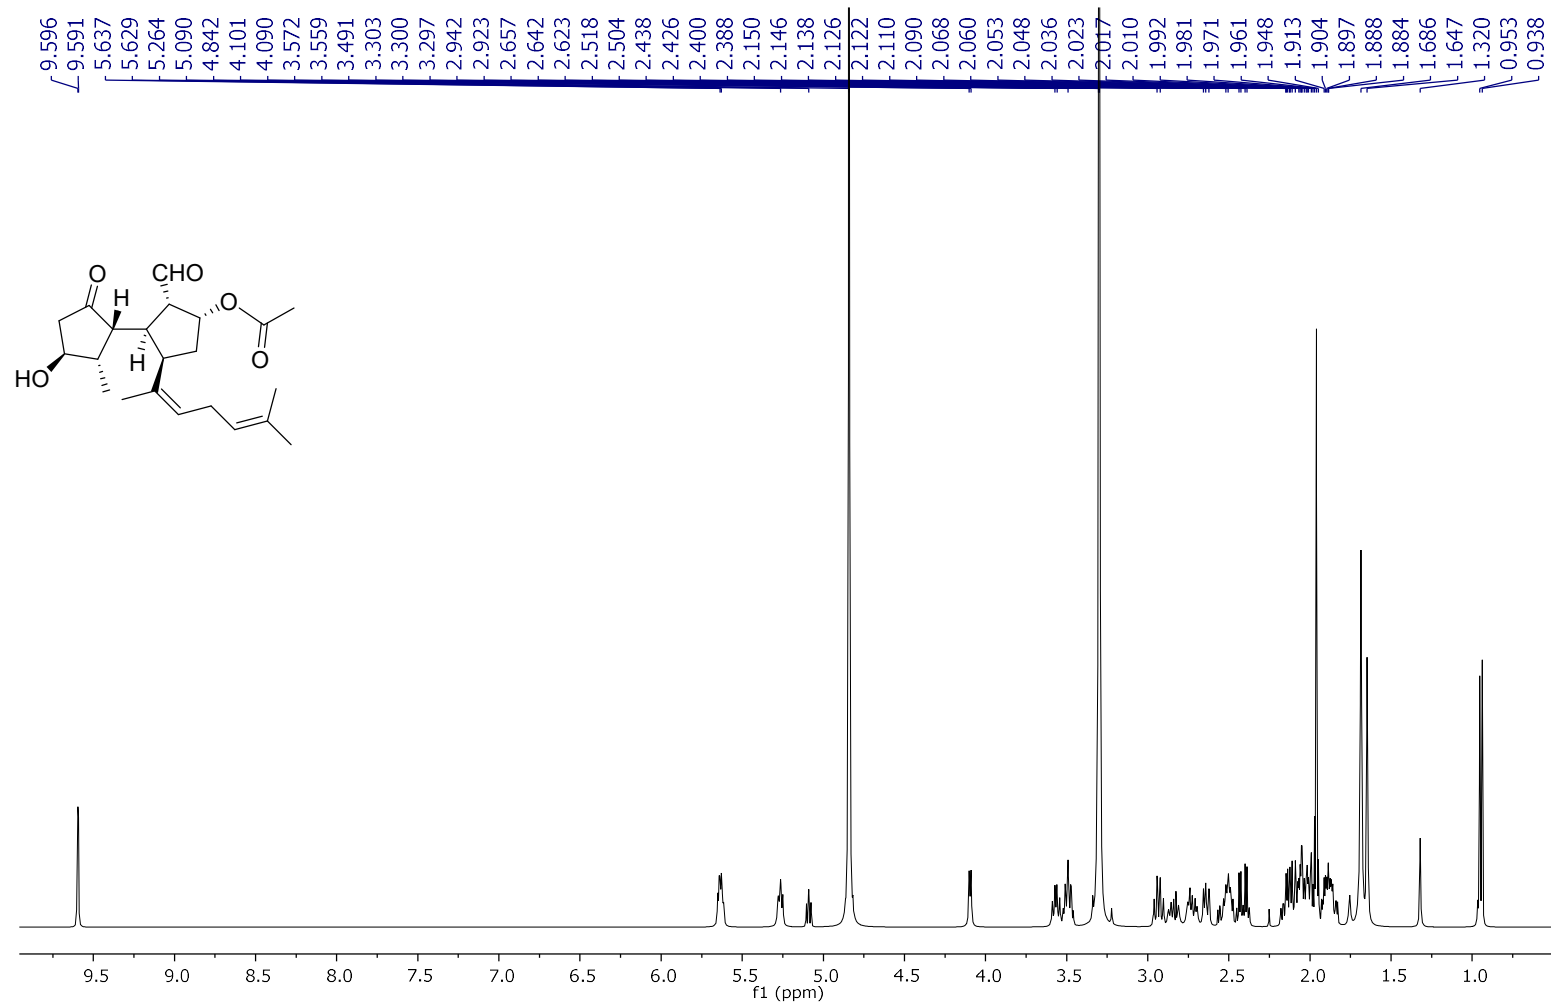

**Figure S11.** <sup>1</sup>HRMN spectrum (500 MHz, CD<sub>3</sub>OD) of rugukamural D (8)

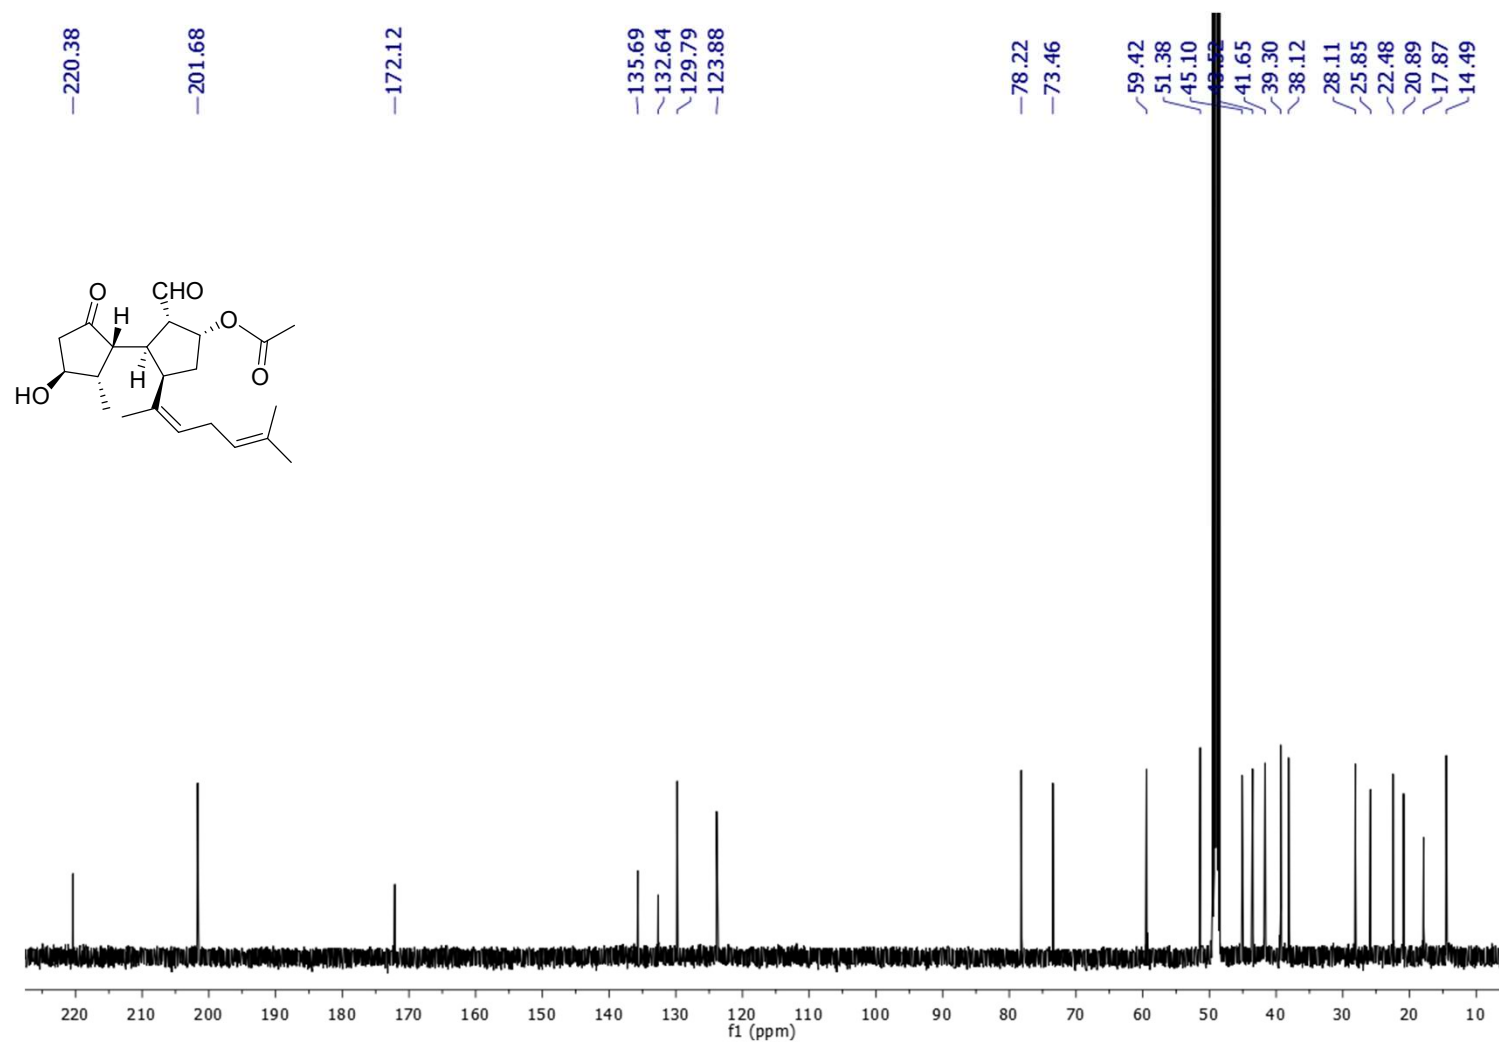

Figure S12. <sup>13</sup>C RMN spectrum (125 MHz, CD<sub>3</sub>OD) of rugukamural D (8)



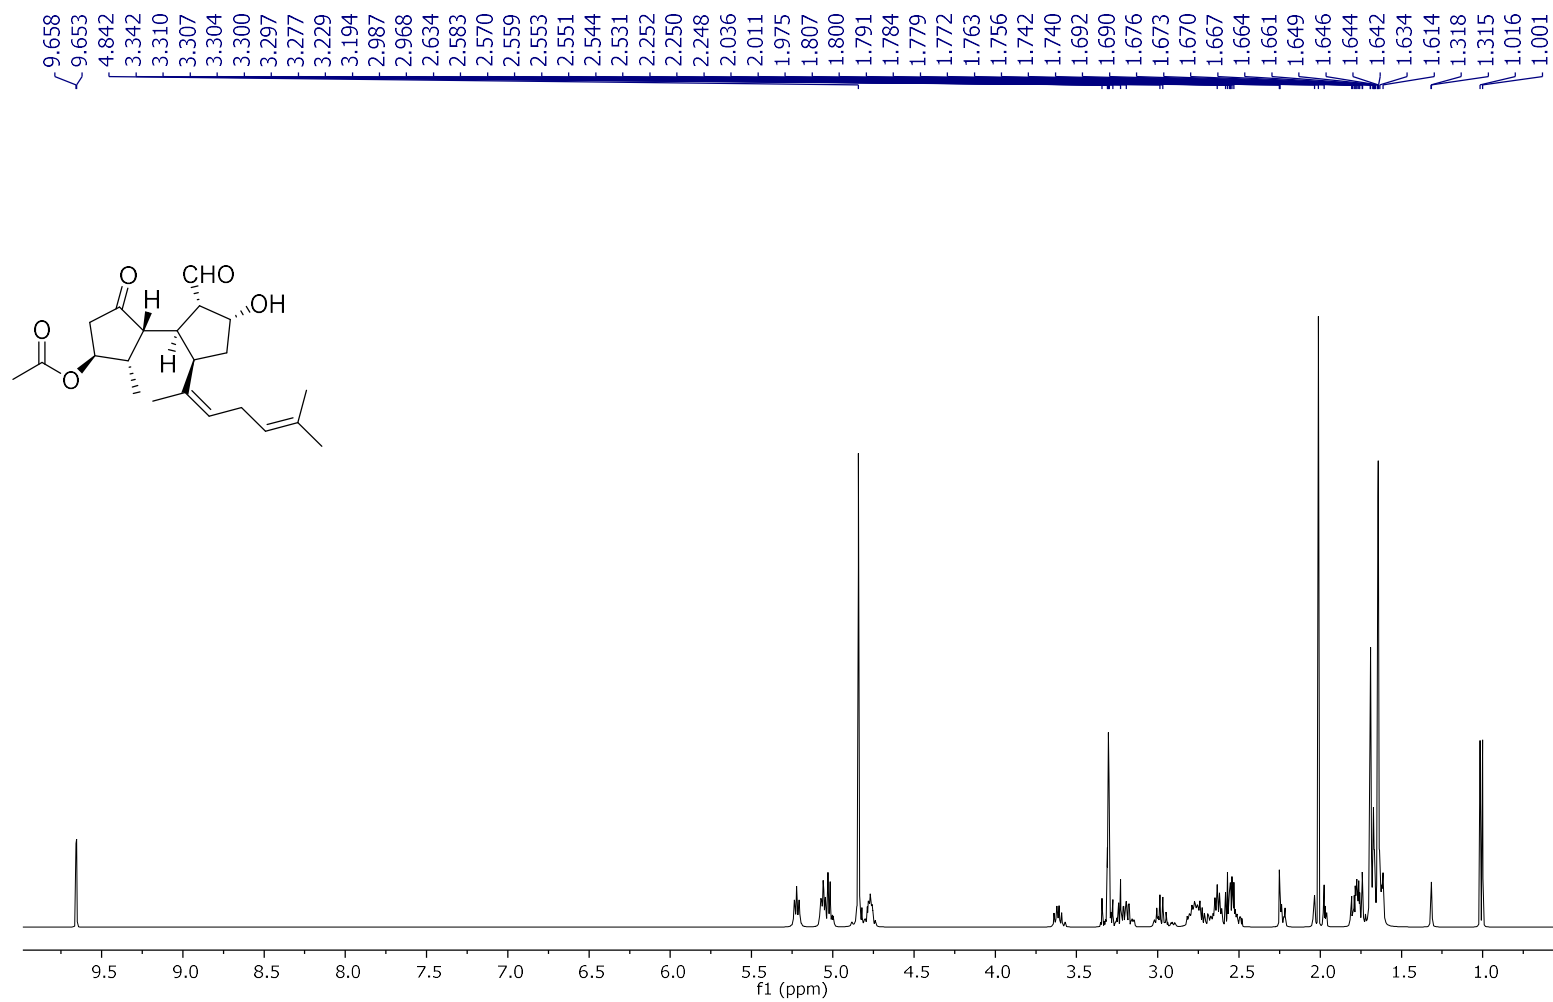

**Figure S13.** <sup>1</sup>H RMN spectrum (500 MHz, CD<sub>3</sub>OD) of compound **9**

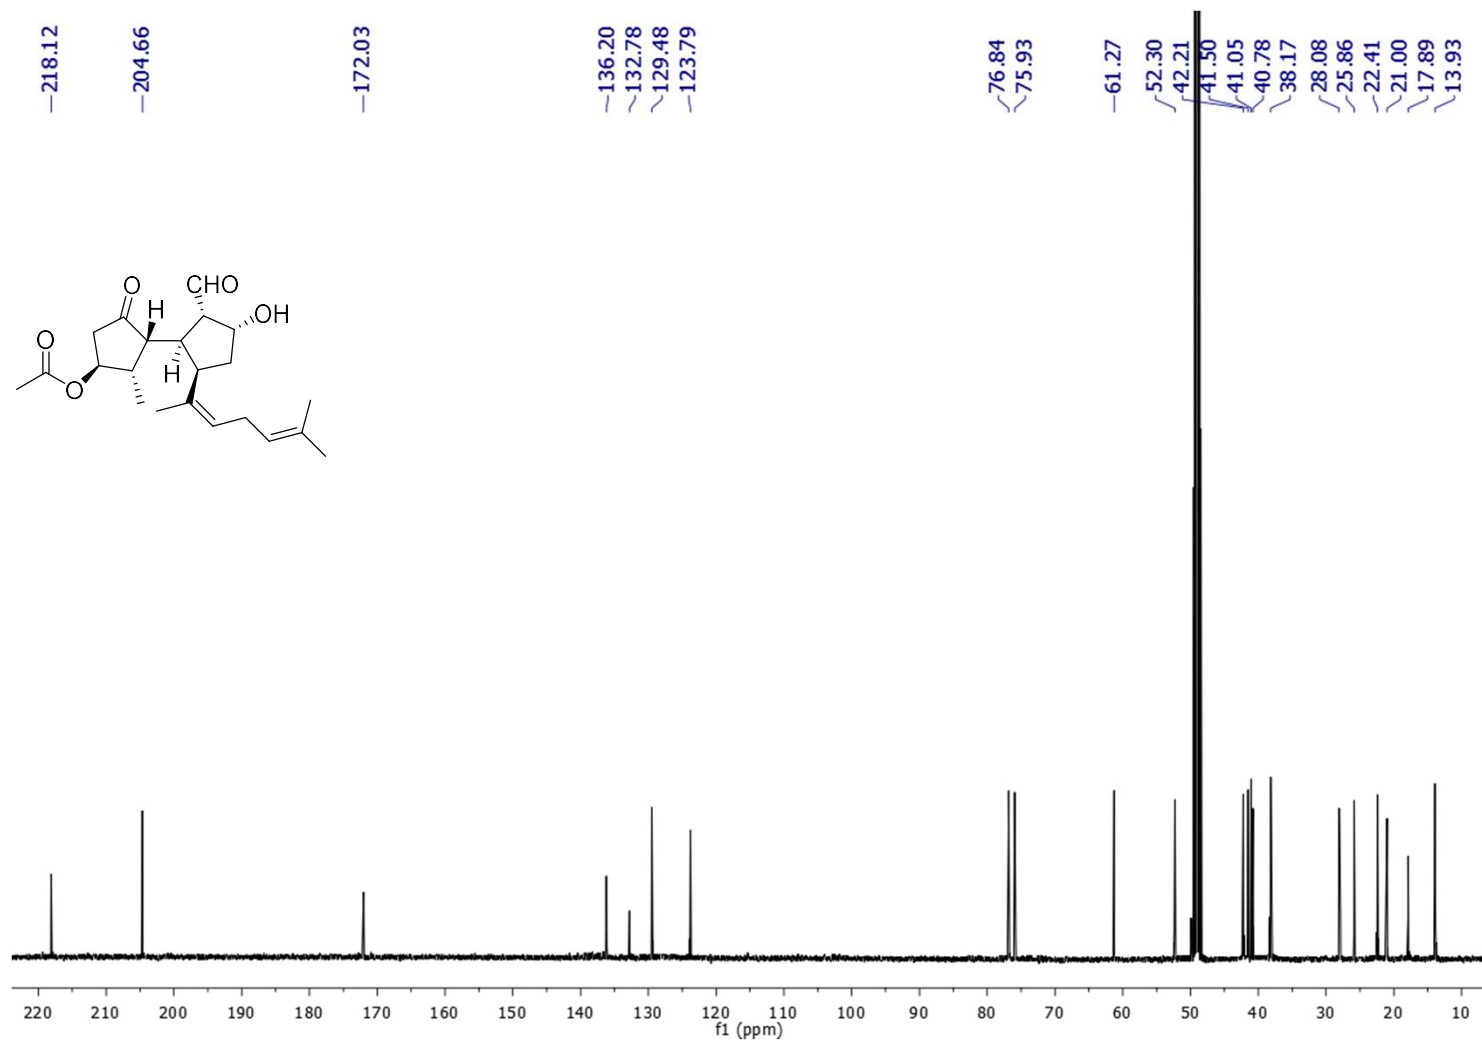

Figure S14. <sup>13</sup>C RMN spectrum (125 MHz, CD<sub>3</sub>OD) of compound 9

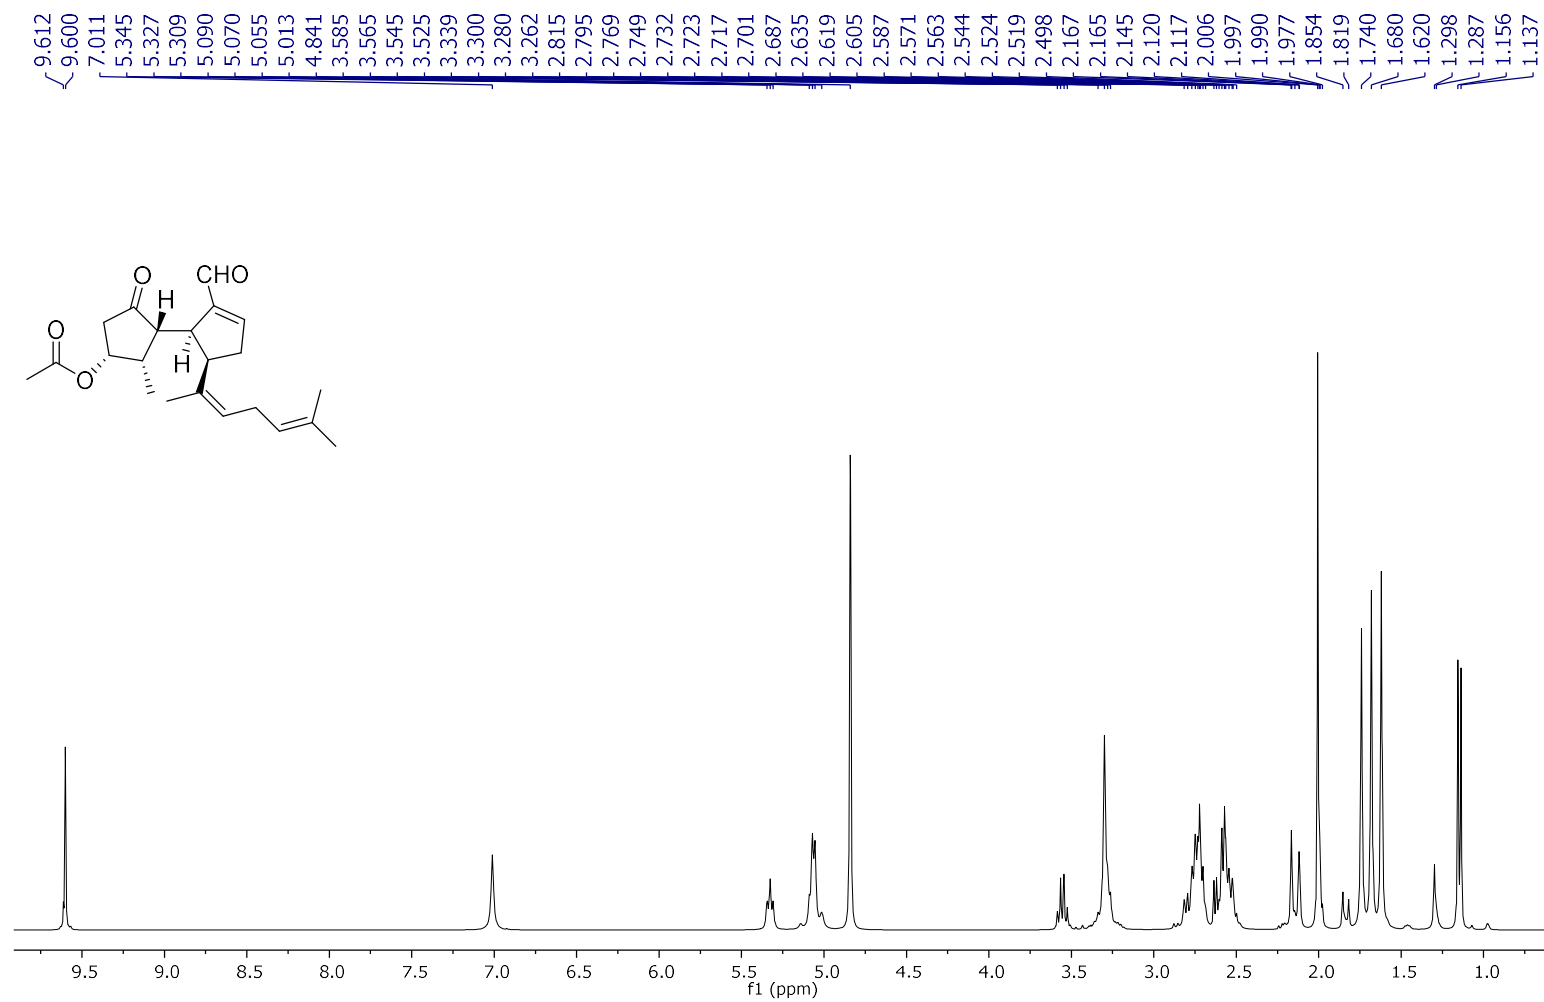

**Figure S15.** <sup>1</sup>H RMN spectrum (500 MHz, CD<sub>3</sub>OD) of compound 10

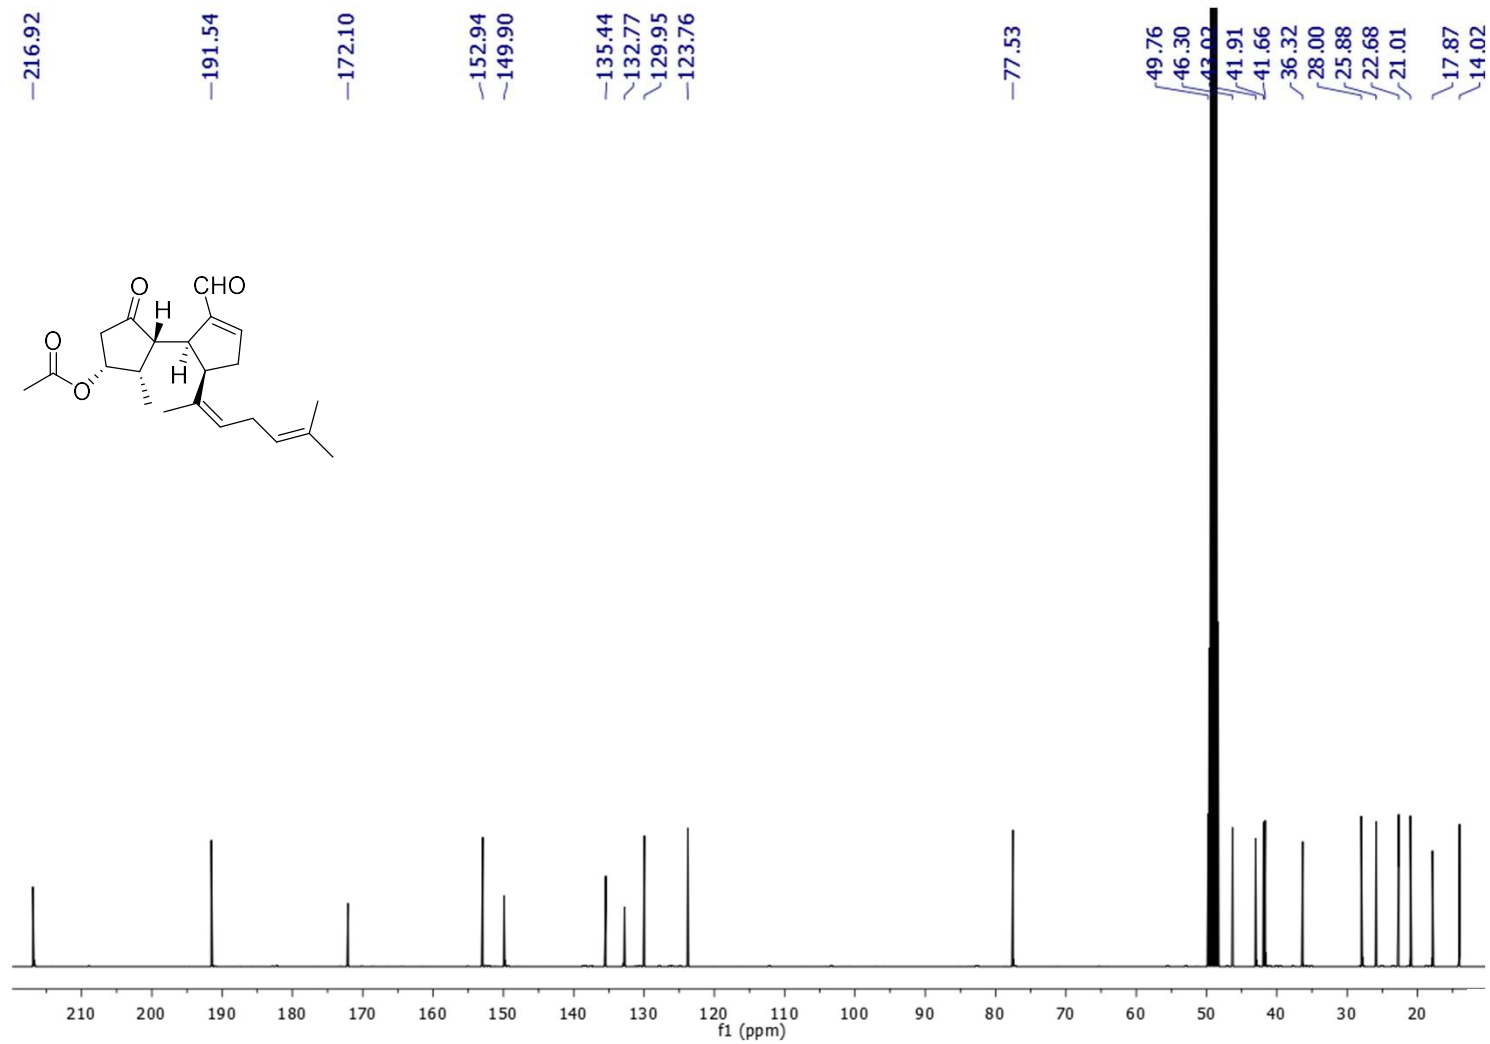

Figure S16. <sup>13</sup>C RMN spectrum (125 MHz, CD<sub>3</sub>OD) of compound 10

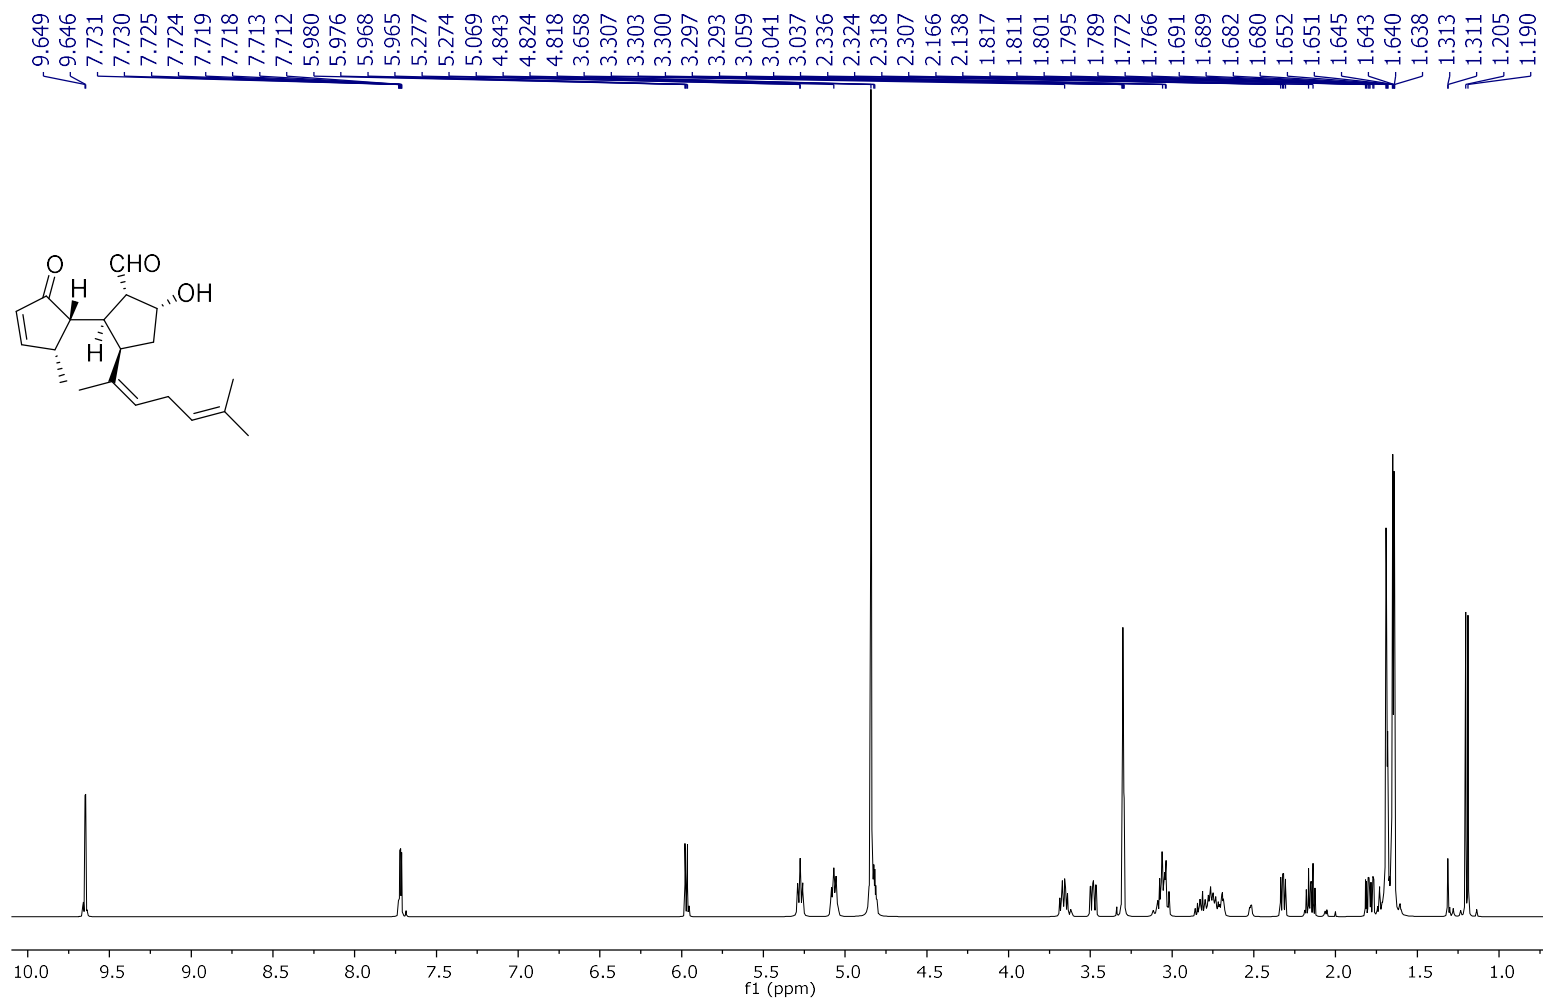

**Figure S17.** <sup>1</sup>H RMN spectrum (500 MHz, CD<sub>3</sub>OD) of compound 11

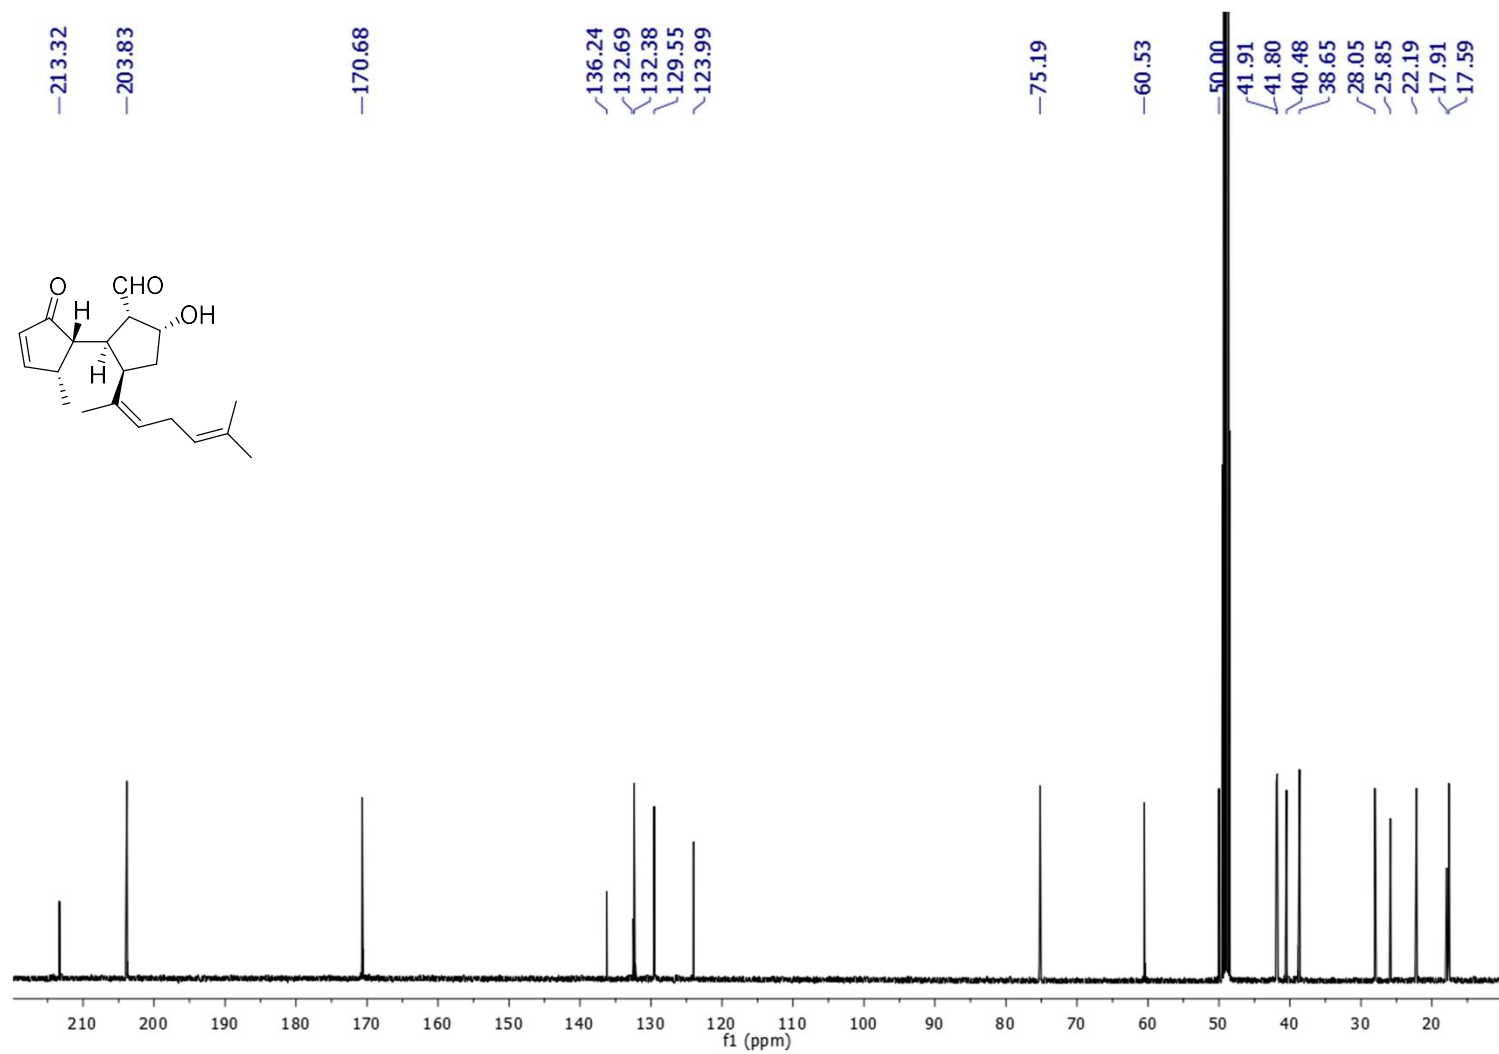

Figure S18. <sup>13</sup>C RMN spectrum (125 MHz, CD<sub>3</sub>OD) of compound 11

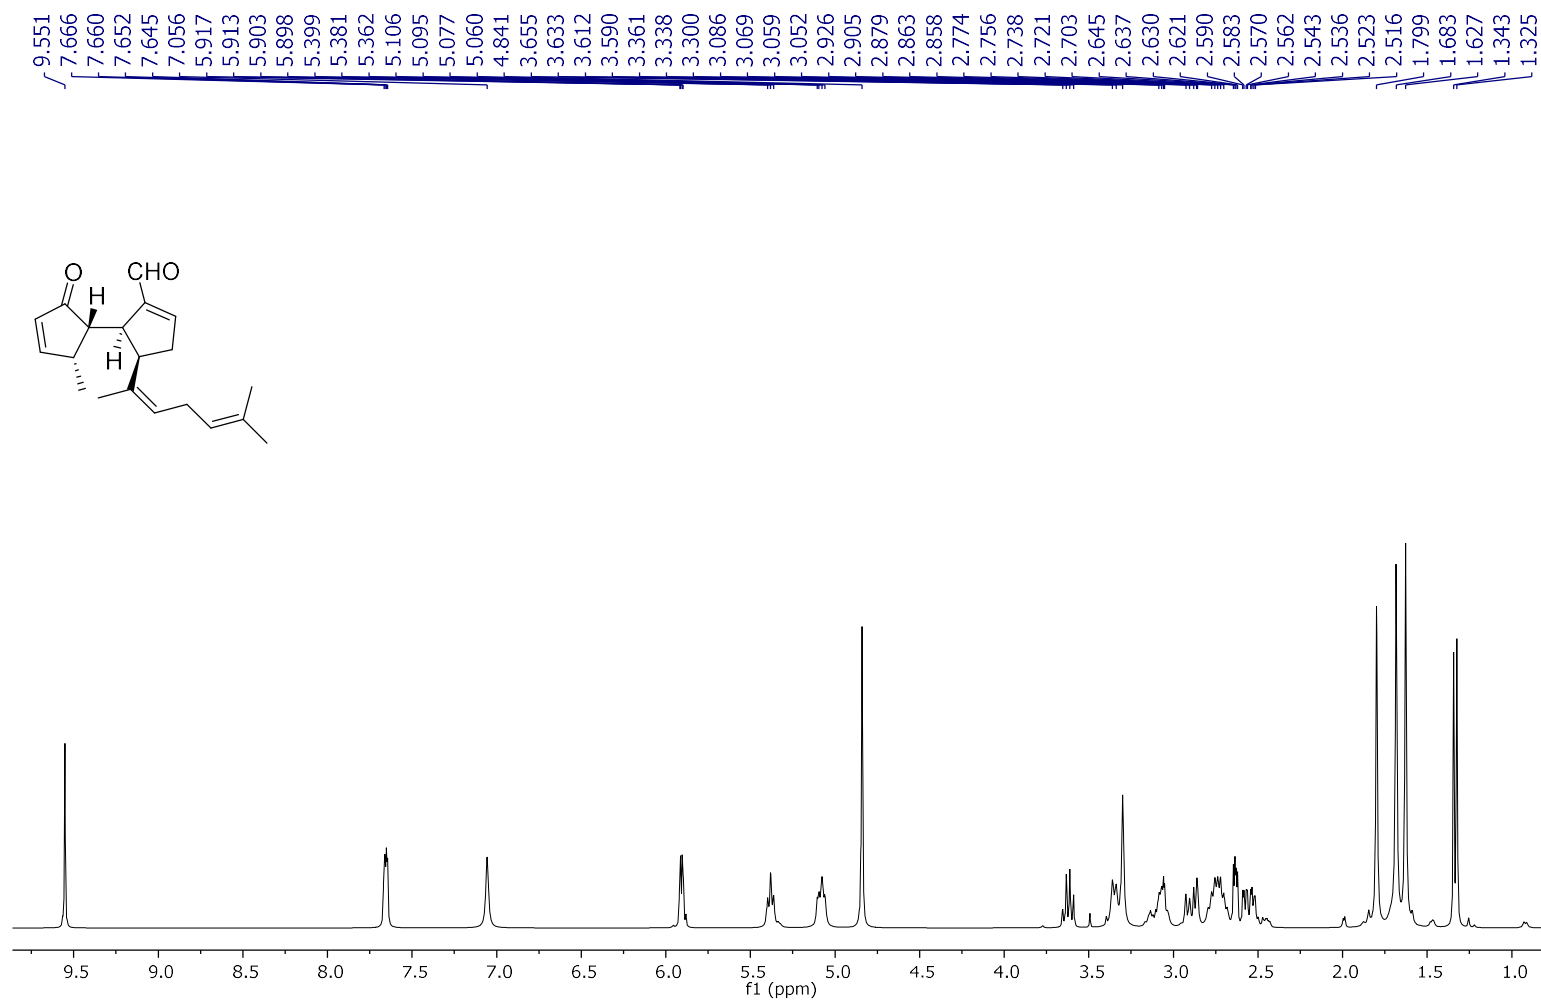

**Figure S19.** <sup>1</sup>H RMN spectrum (500 MHz, CD<sub>3</sub>OD) of compound 12

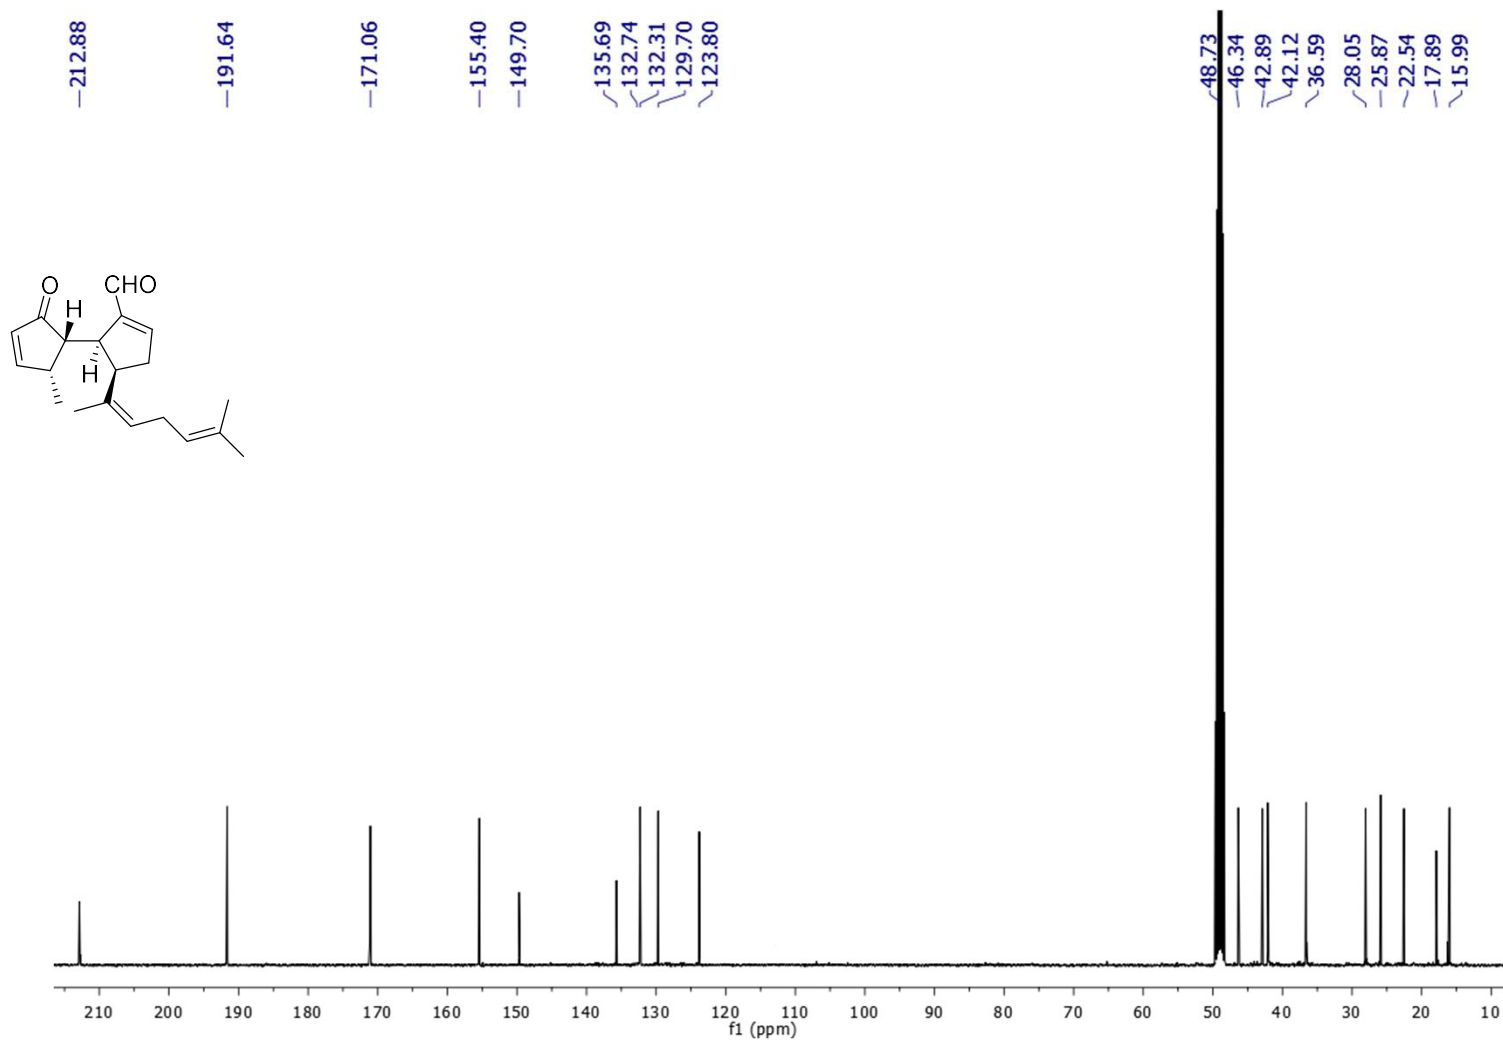

Figure S20. <sup>13</sup>C RMN spectrum (125 MHz, CD<sub>3</sub>OD) of compound 12



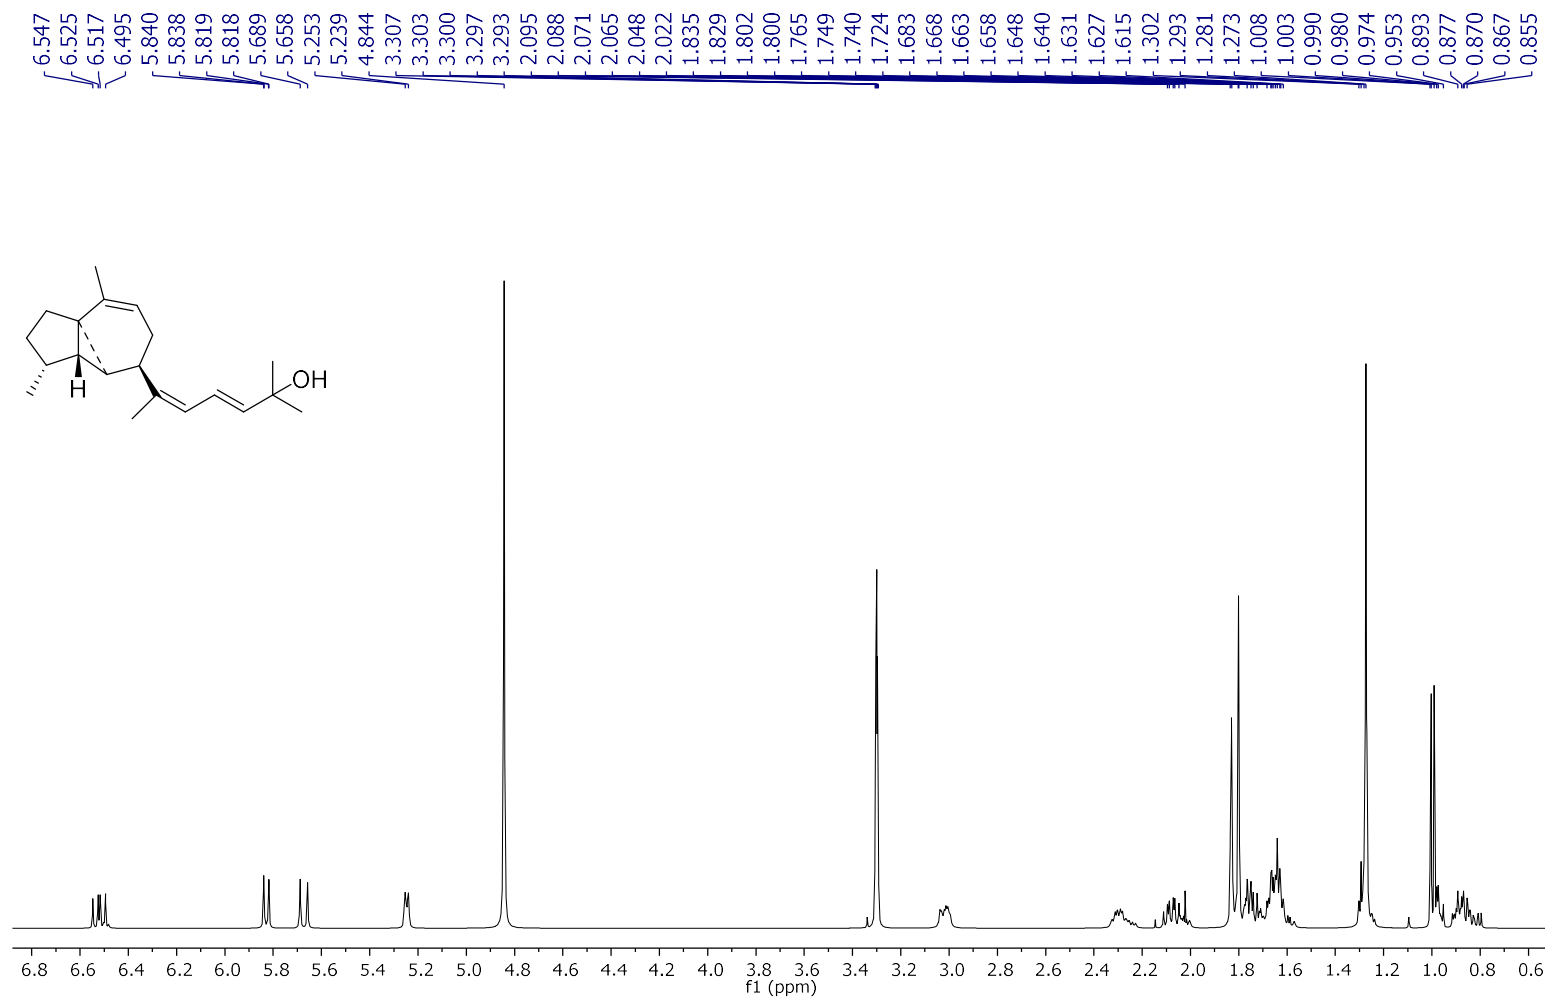

**Figure S21.** <sup>1</sup>H RMN spectrum (500 MHz, CD<sub>3</sub>OD) of okacubol A (13)



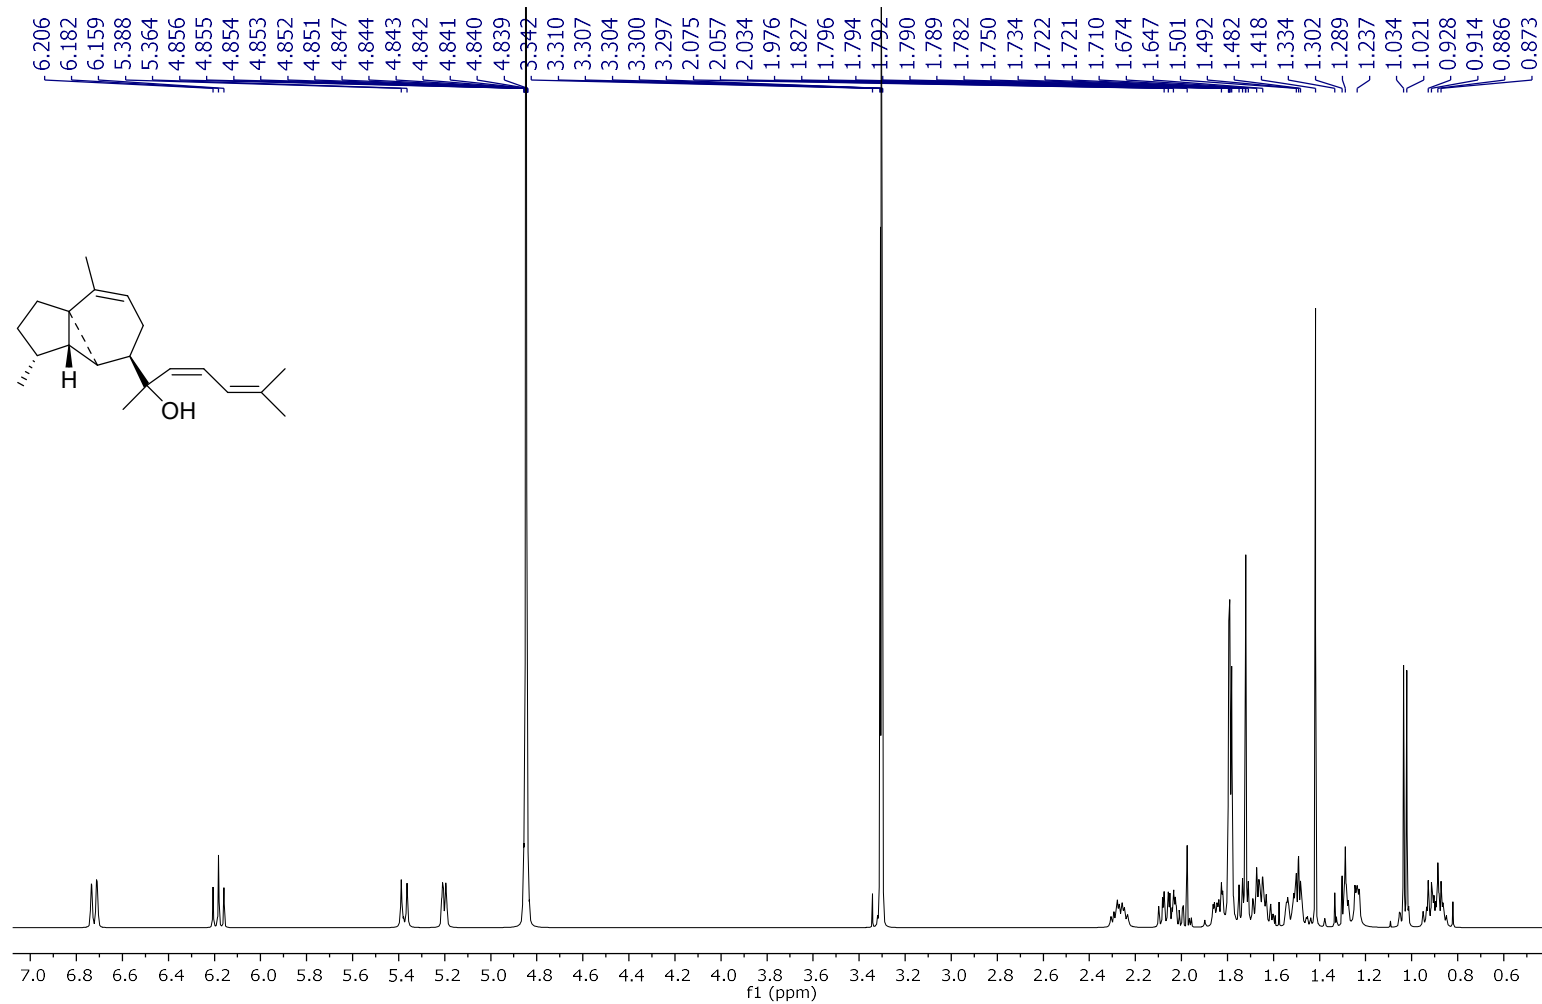

**Figure S23.** <sup>1</sup>H RMN spectrum (500 MHz, CD<sub>3</sub>OD) of okacubol B (**14**)

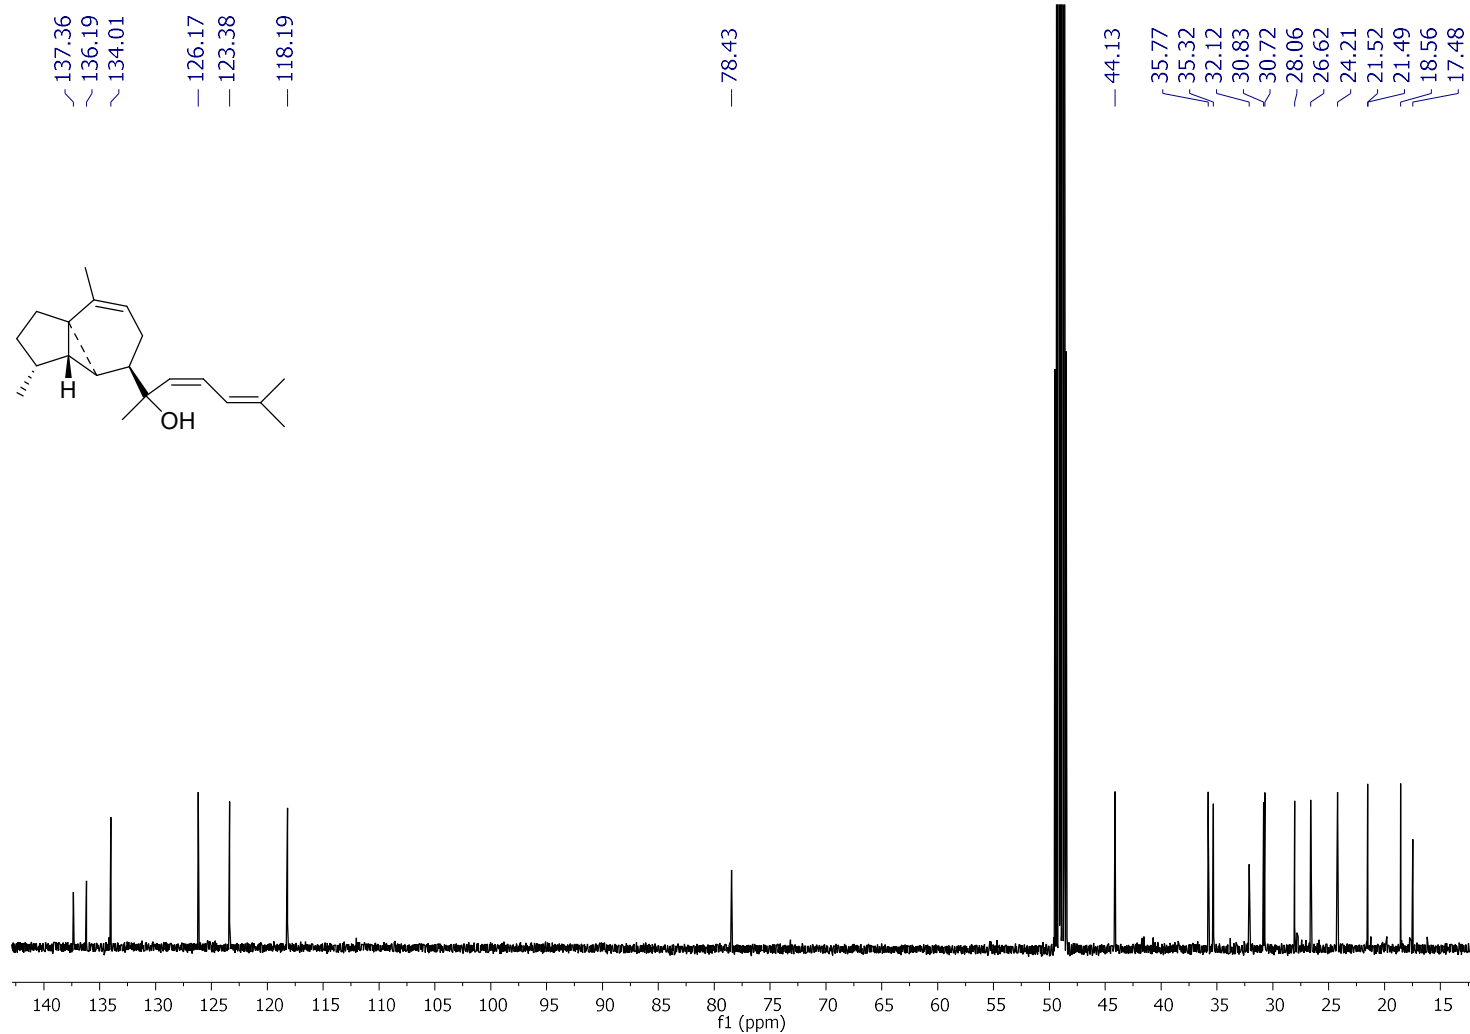

Figure S24. <sup>13</sup>C RMN spectrum (125 MHz, CD<sub>3</sub>OD) of okacubol A (14)

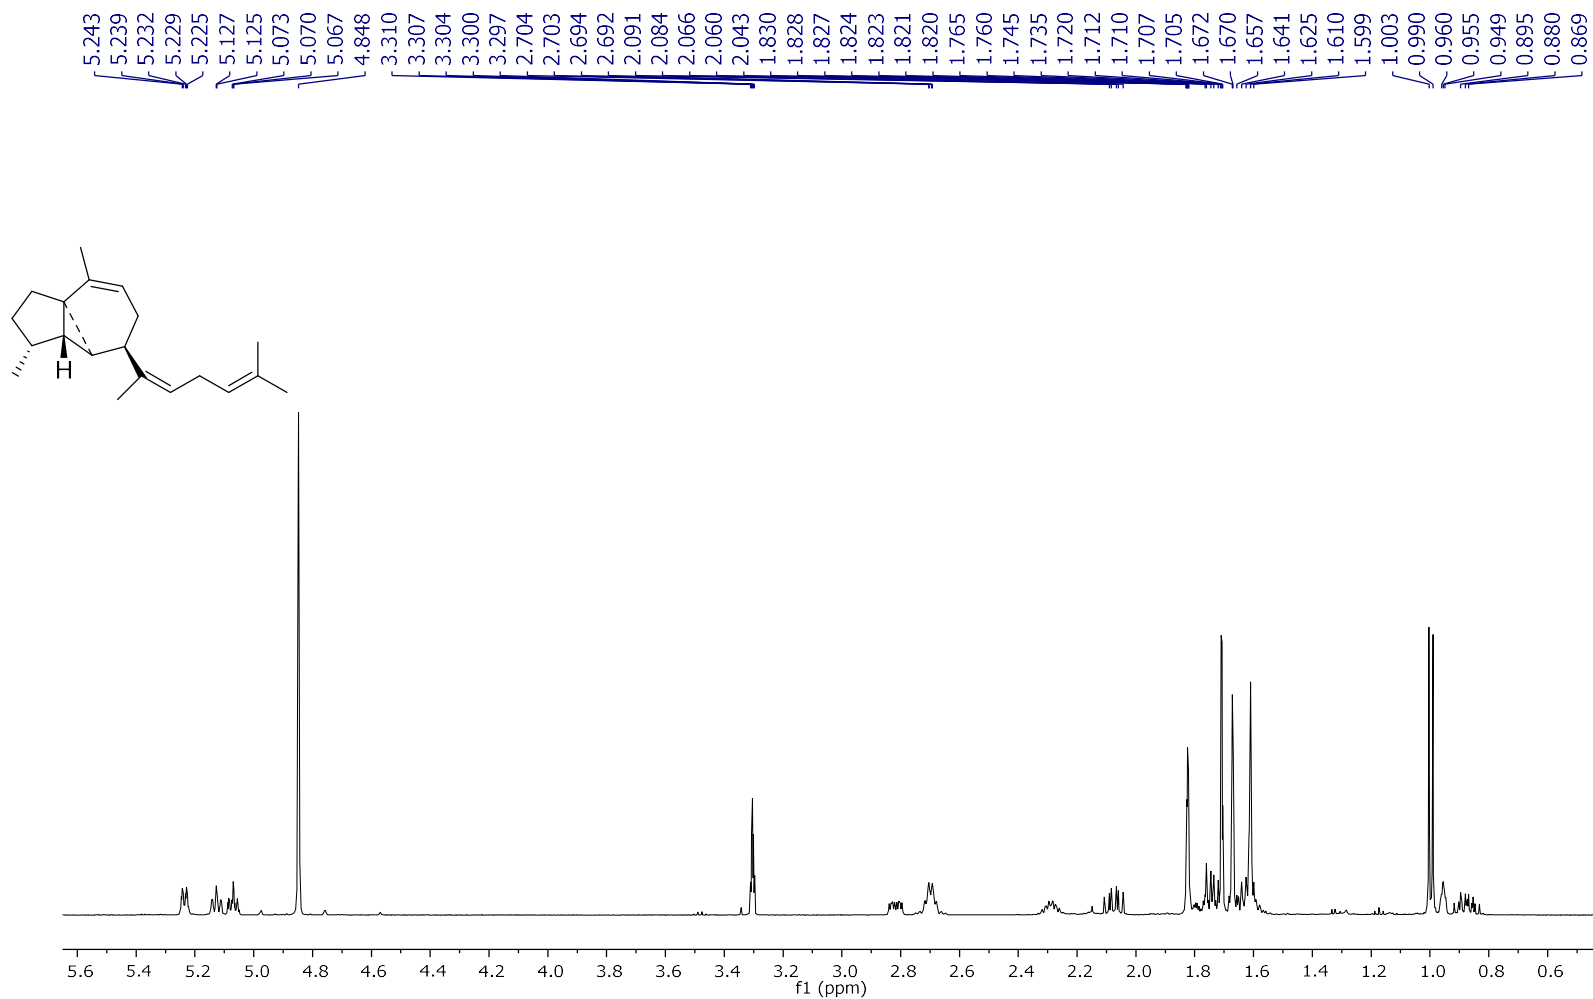

Figure S25. <sup>1</sup>H RMN spectrum (500 MHz, CD<sub>3</sub>OD) of compound 15

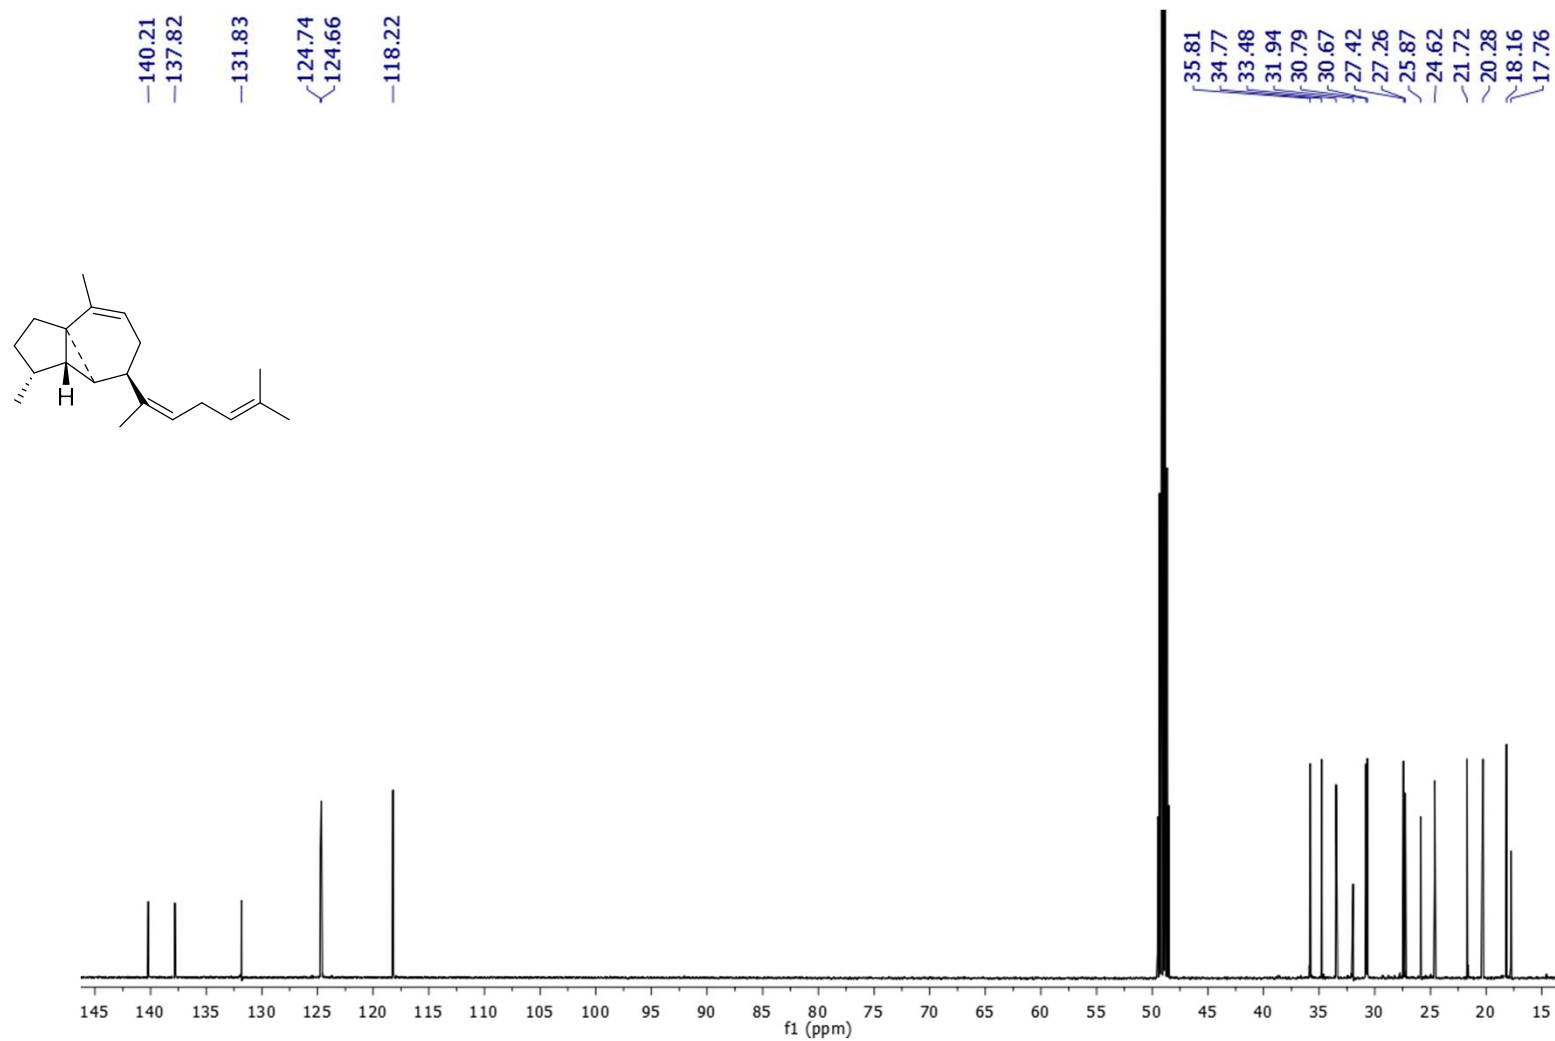

Figure S26.  $^{13}\text{C}$  RMN spectrum (125 MHz,  $\text{CD}_3\text{OD}$ ) of compound 15

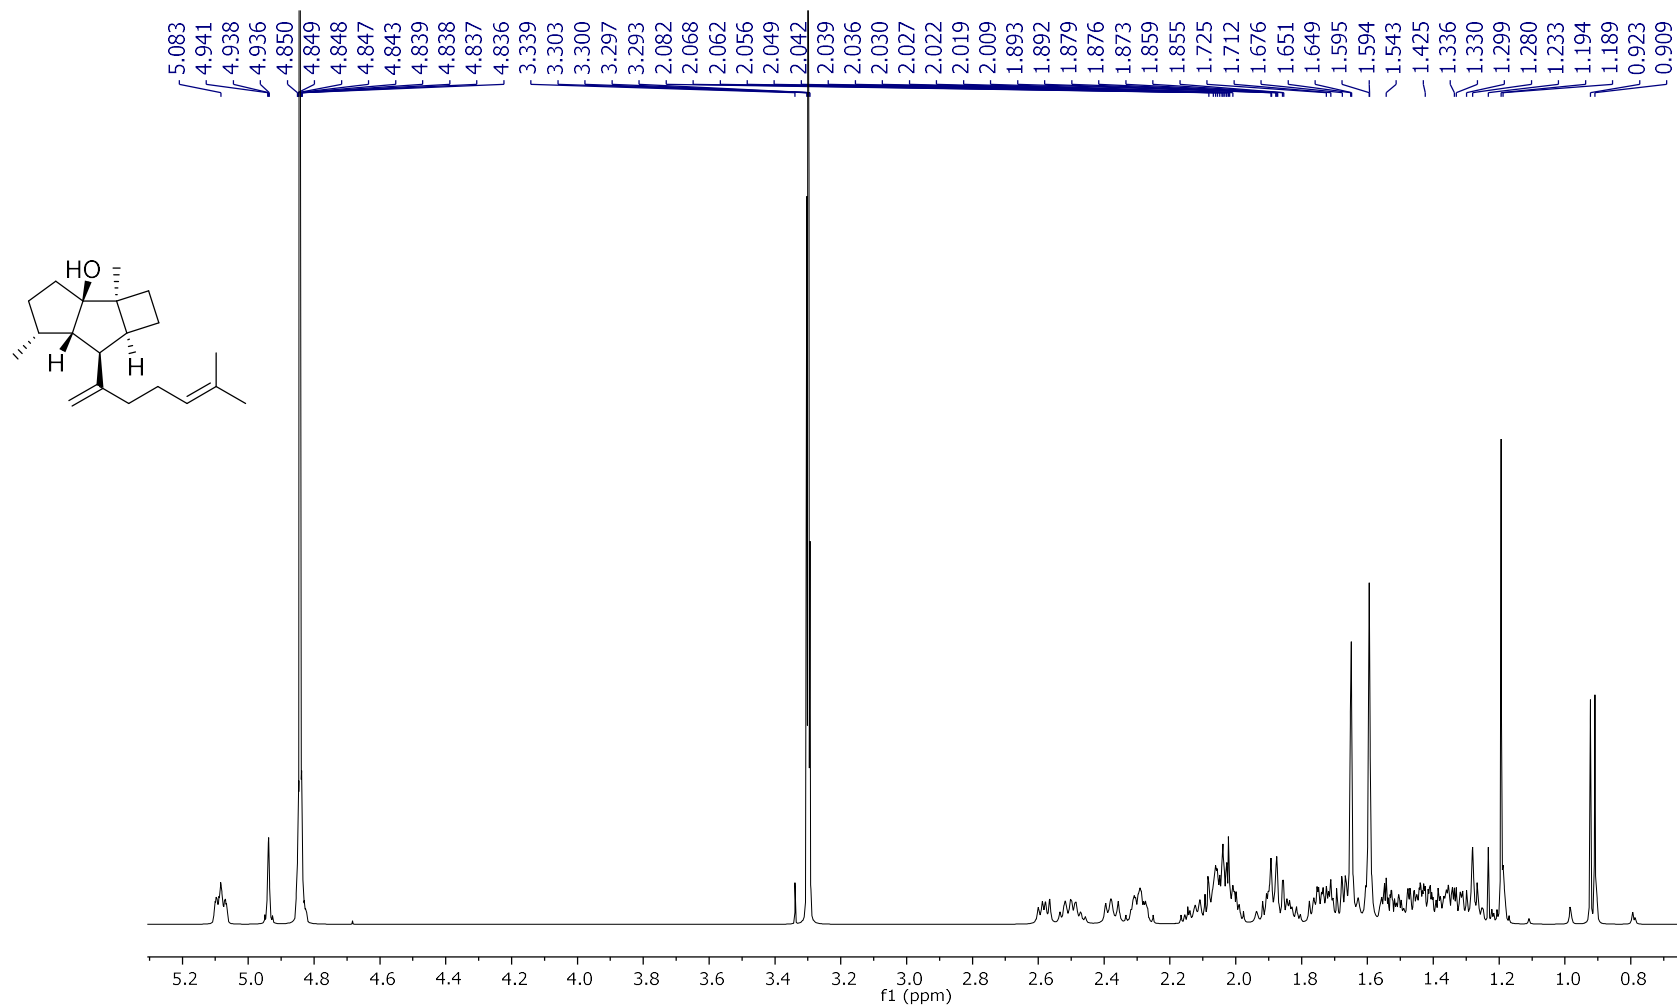

**Figure S27.** <sup>1</sup>H RMN spectrum (500 MHz, CD<sub>3</sub>OD) of okamurol A (16)

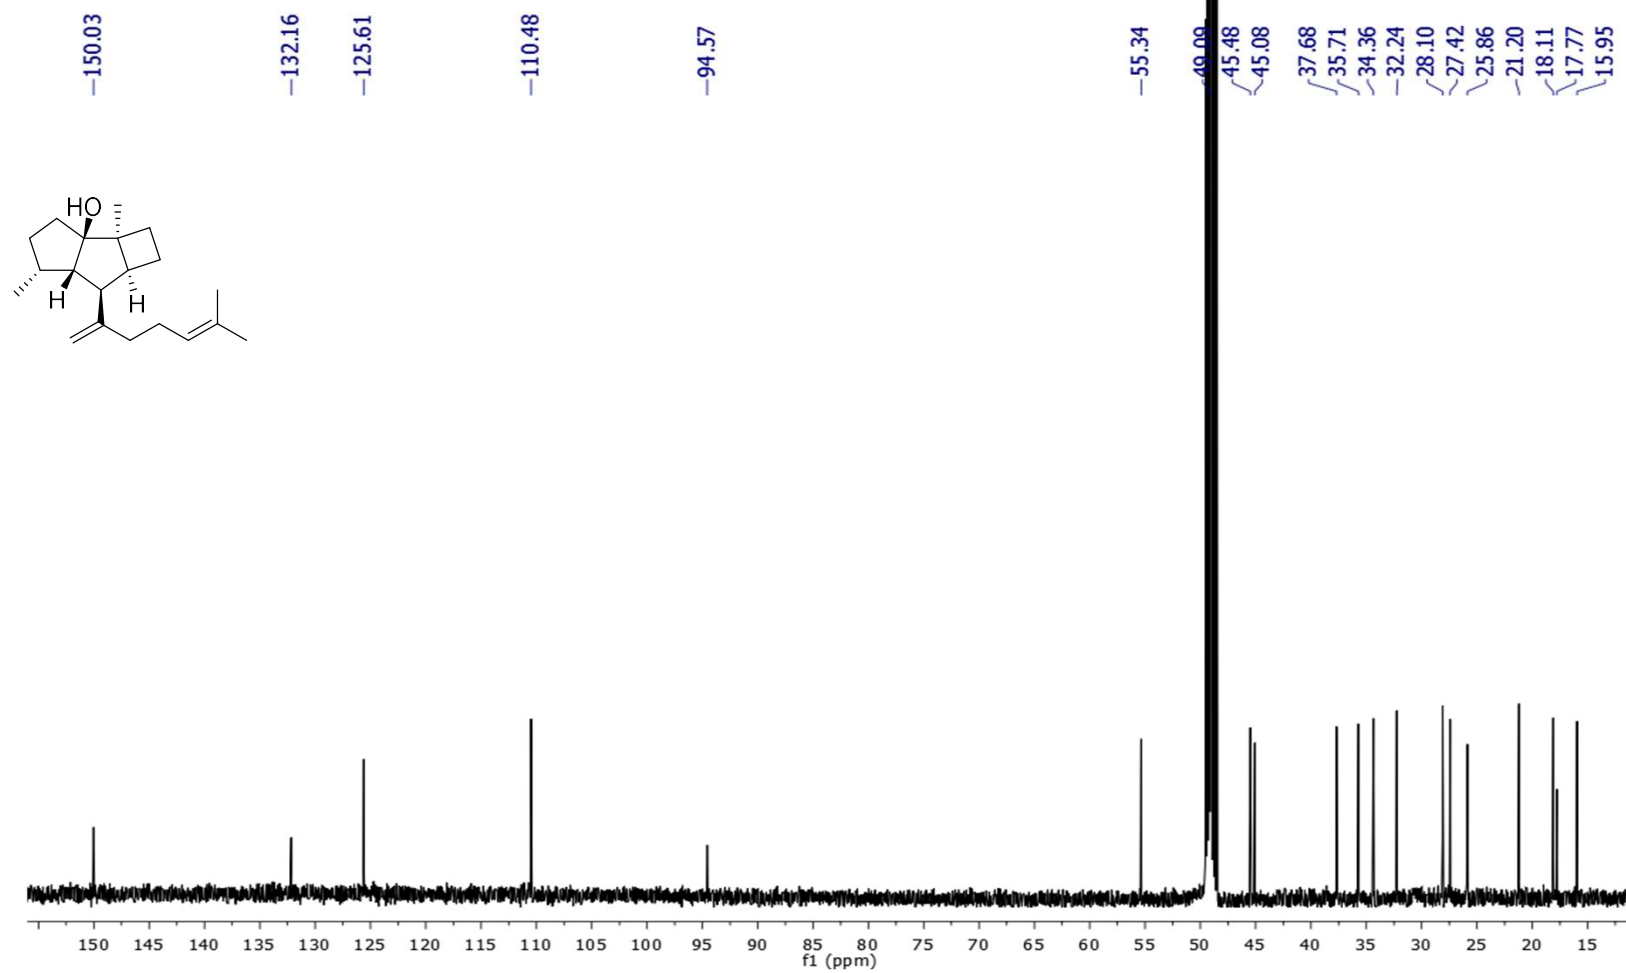

Figure S28. <sup>13</sup>C RMN spectrum (125 MHz, CD<sub>3</sub>OD) of okamurol A (16)



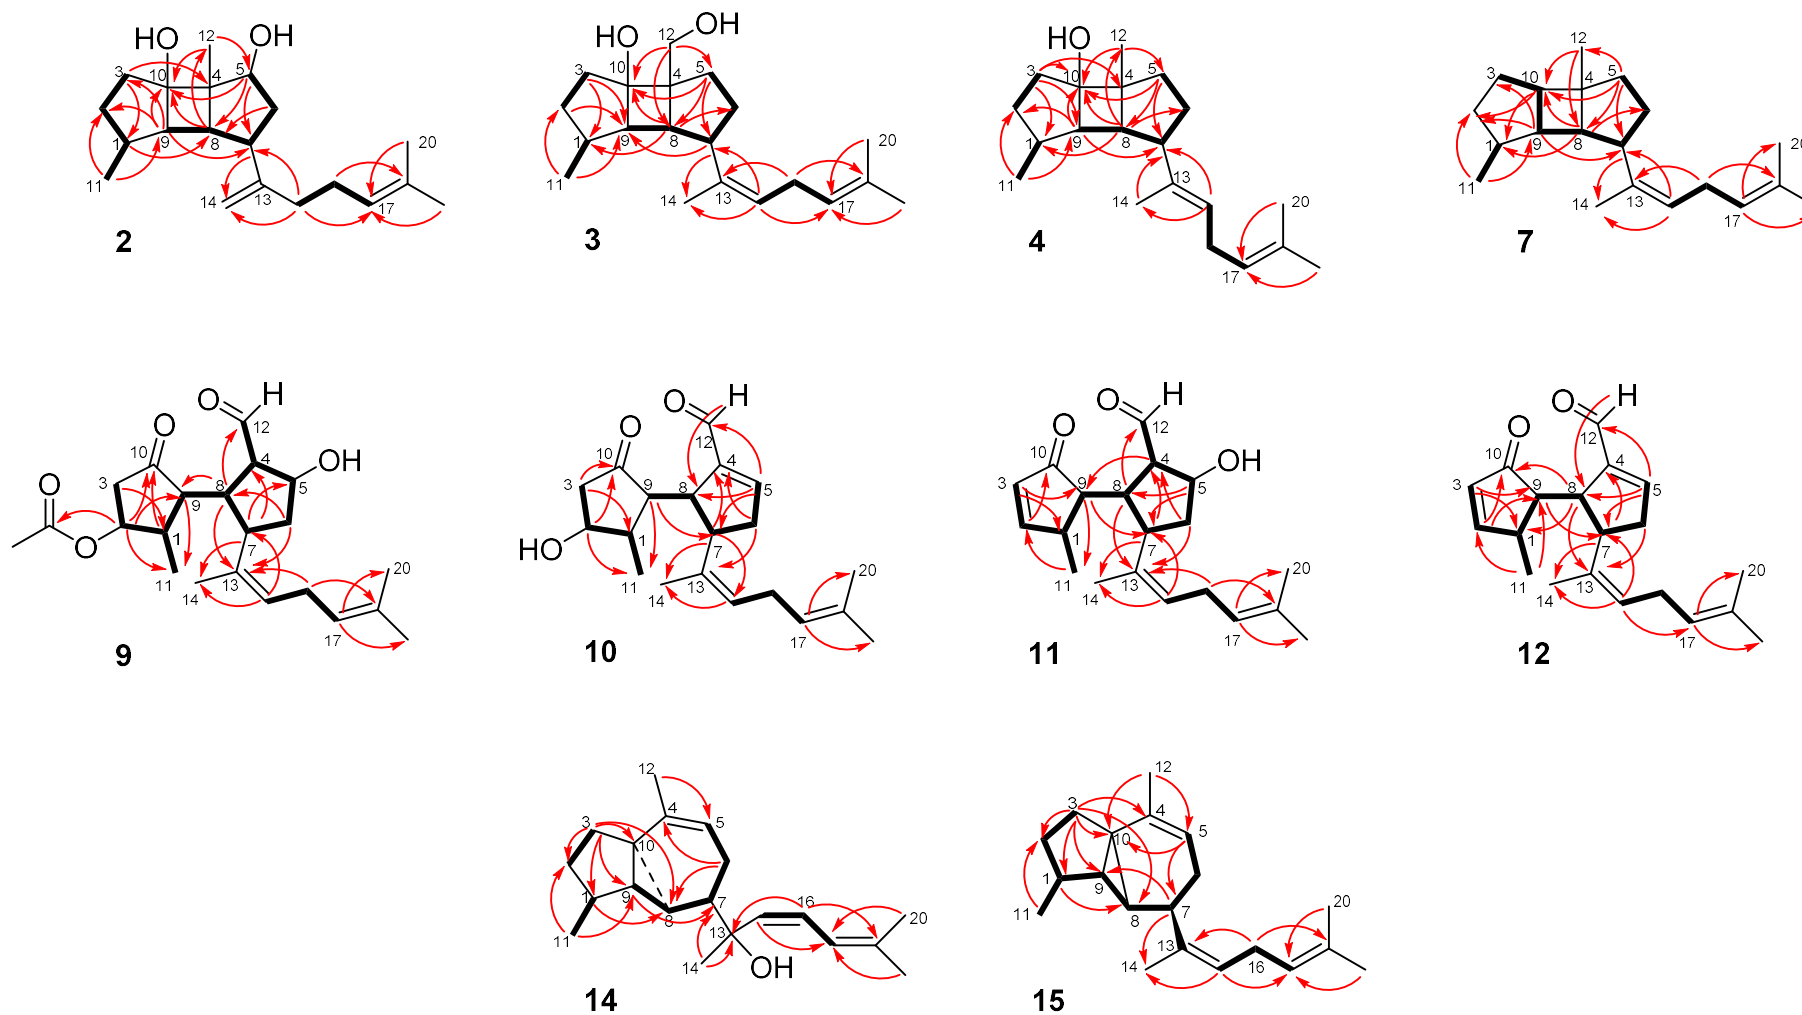

**Figure S29.** Key COSY (bold bond) and HMBC correlations (arrow) observed for compounds 2-4, 7, 9-12, 14, and 15

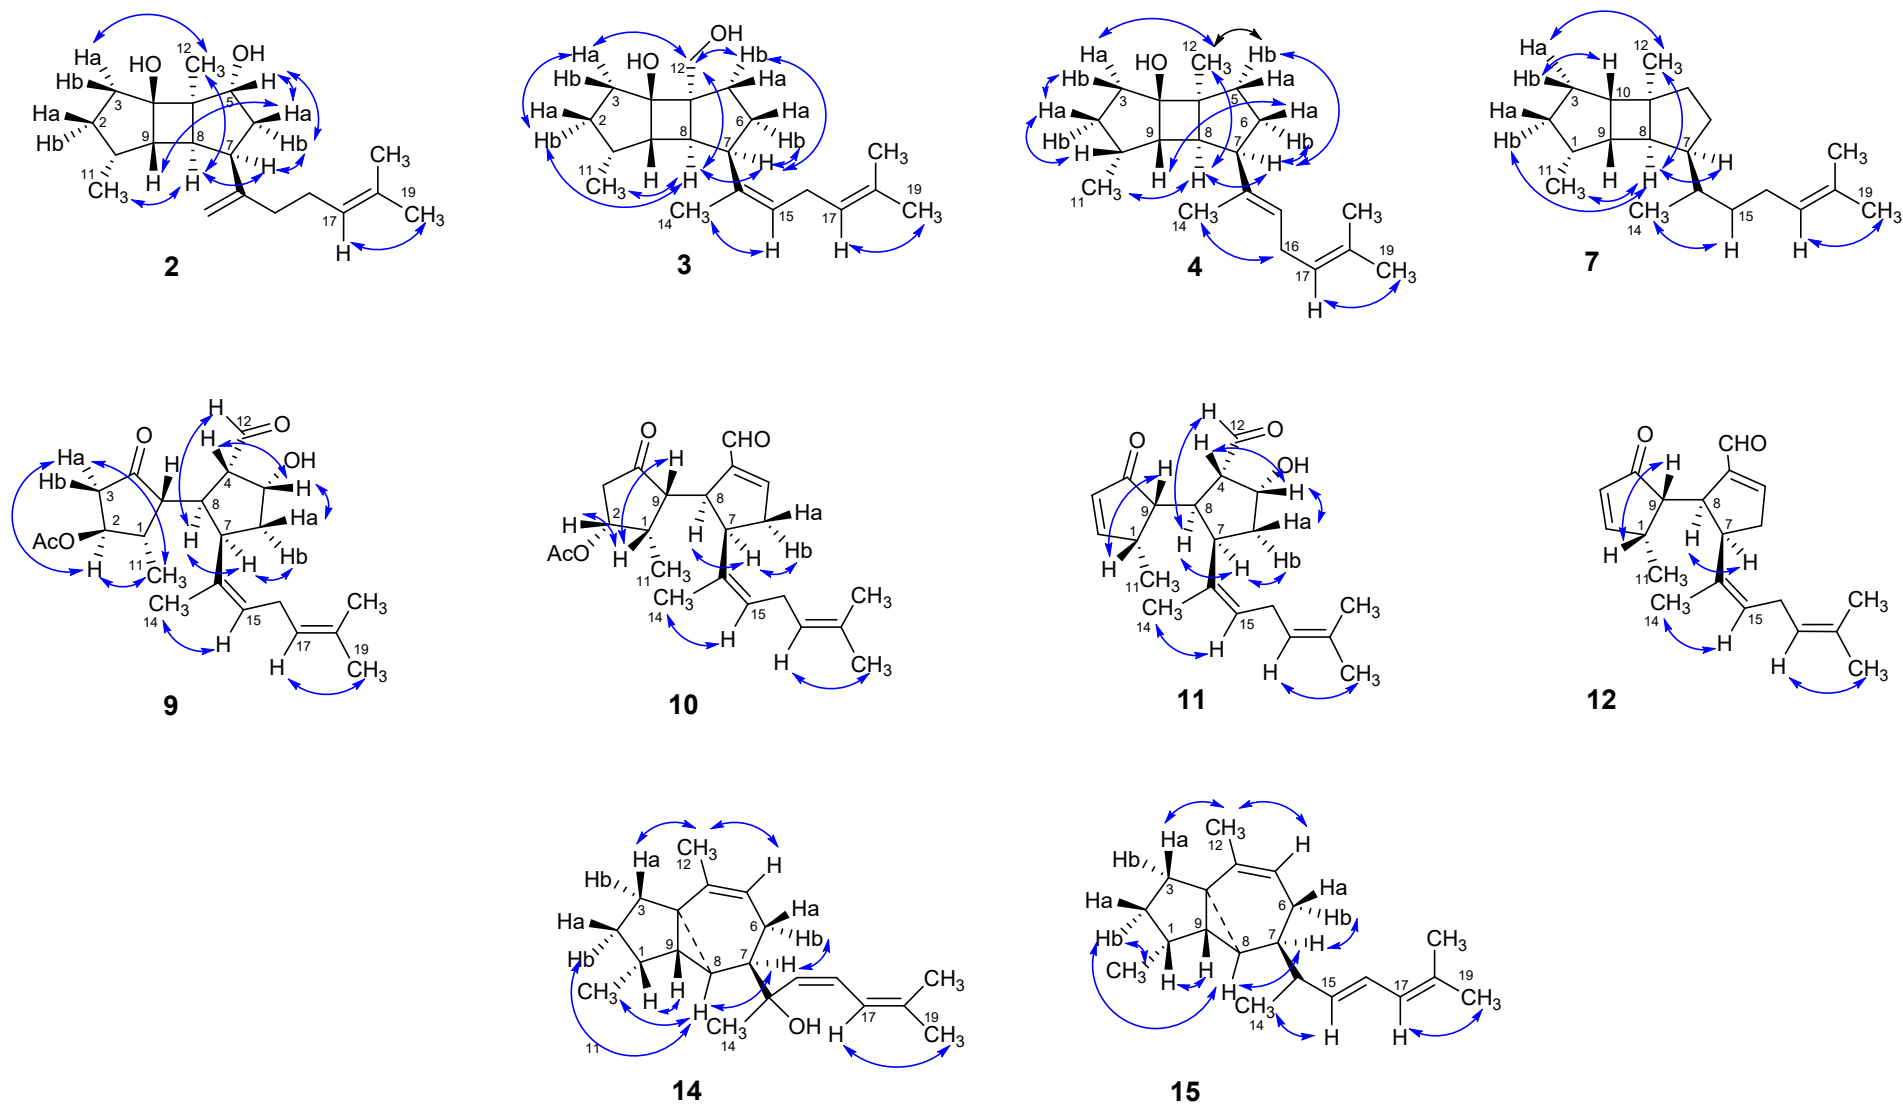

**Figure S30.** Key NOESY correlations observed for compounds 2-4, 7, 9-12, 14, and 15

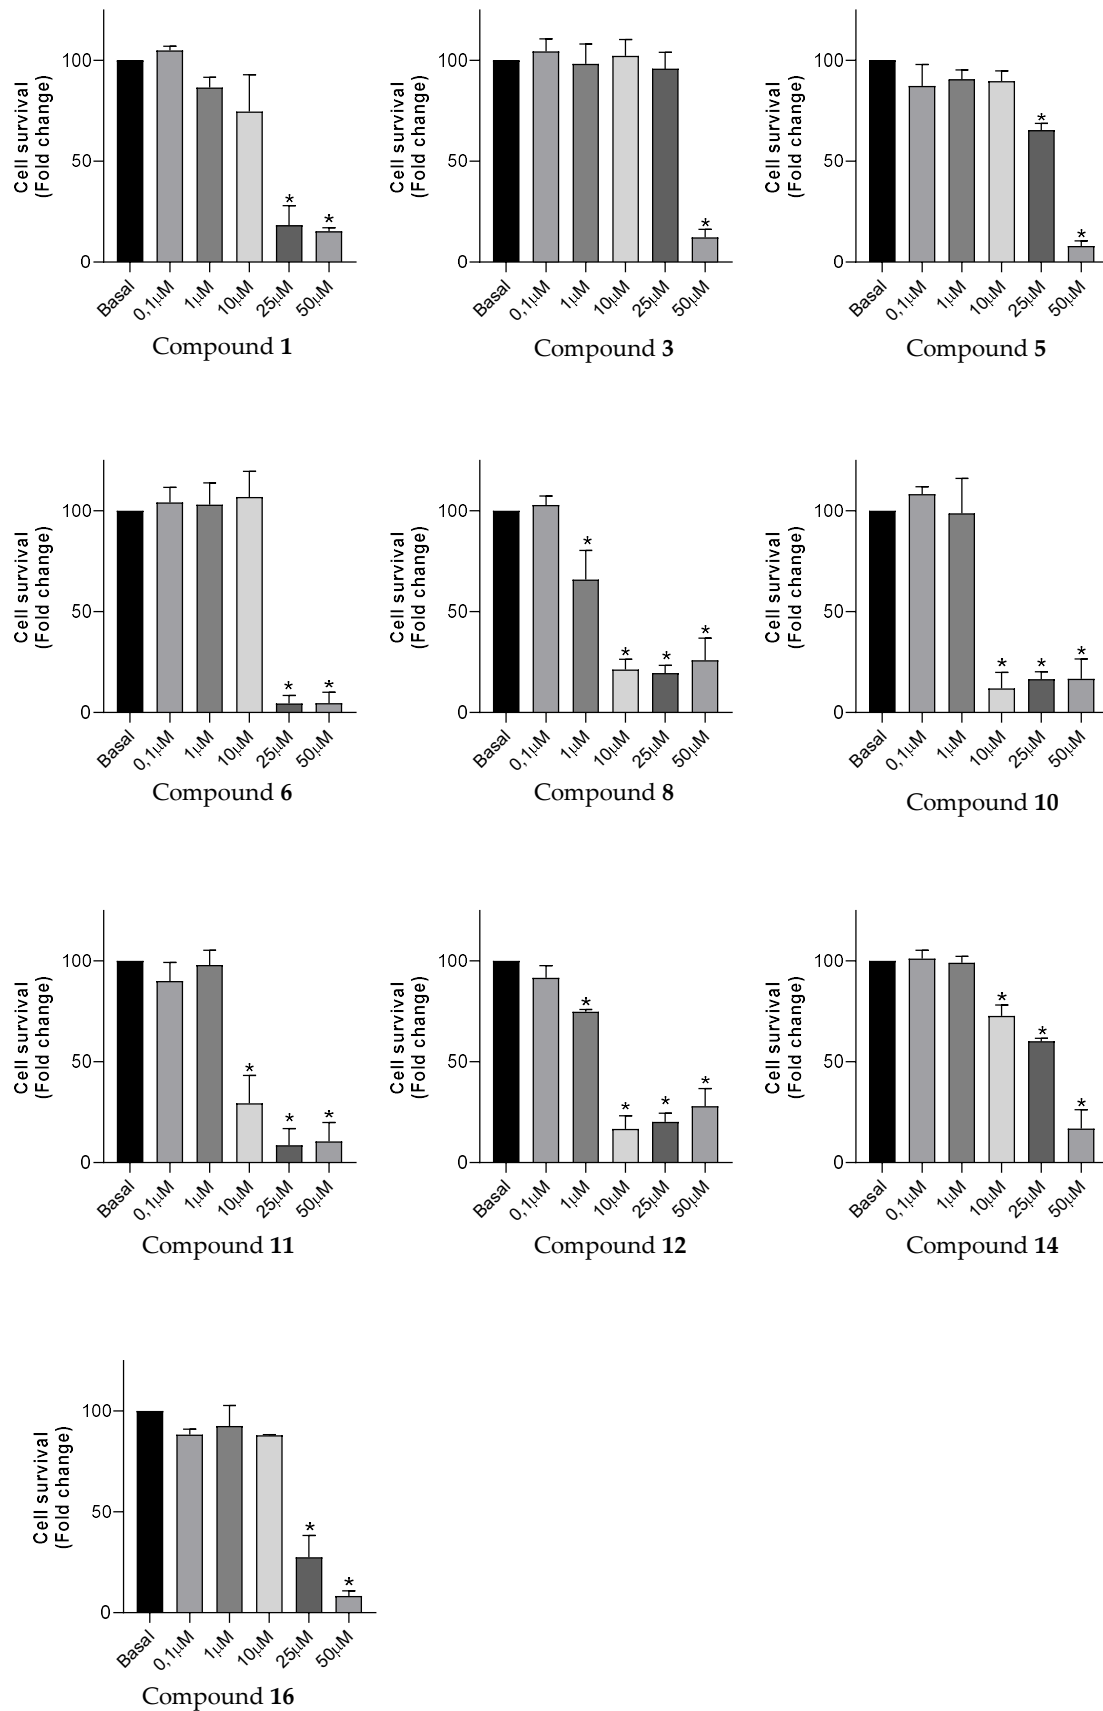

Figure S31. Dose-response cell viability of Bv.2 cells was determined by crystal violet assay. The results are mean  $\pm$  SD ( $n \geq 3$  independent experiments performed in duplicate). Significant differences were determined by two way ANOVA followed by Bonferroni t-test  $*p \leq 0.05$  vs Basal.

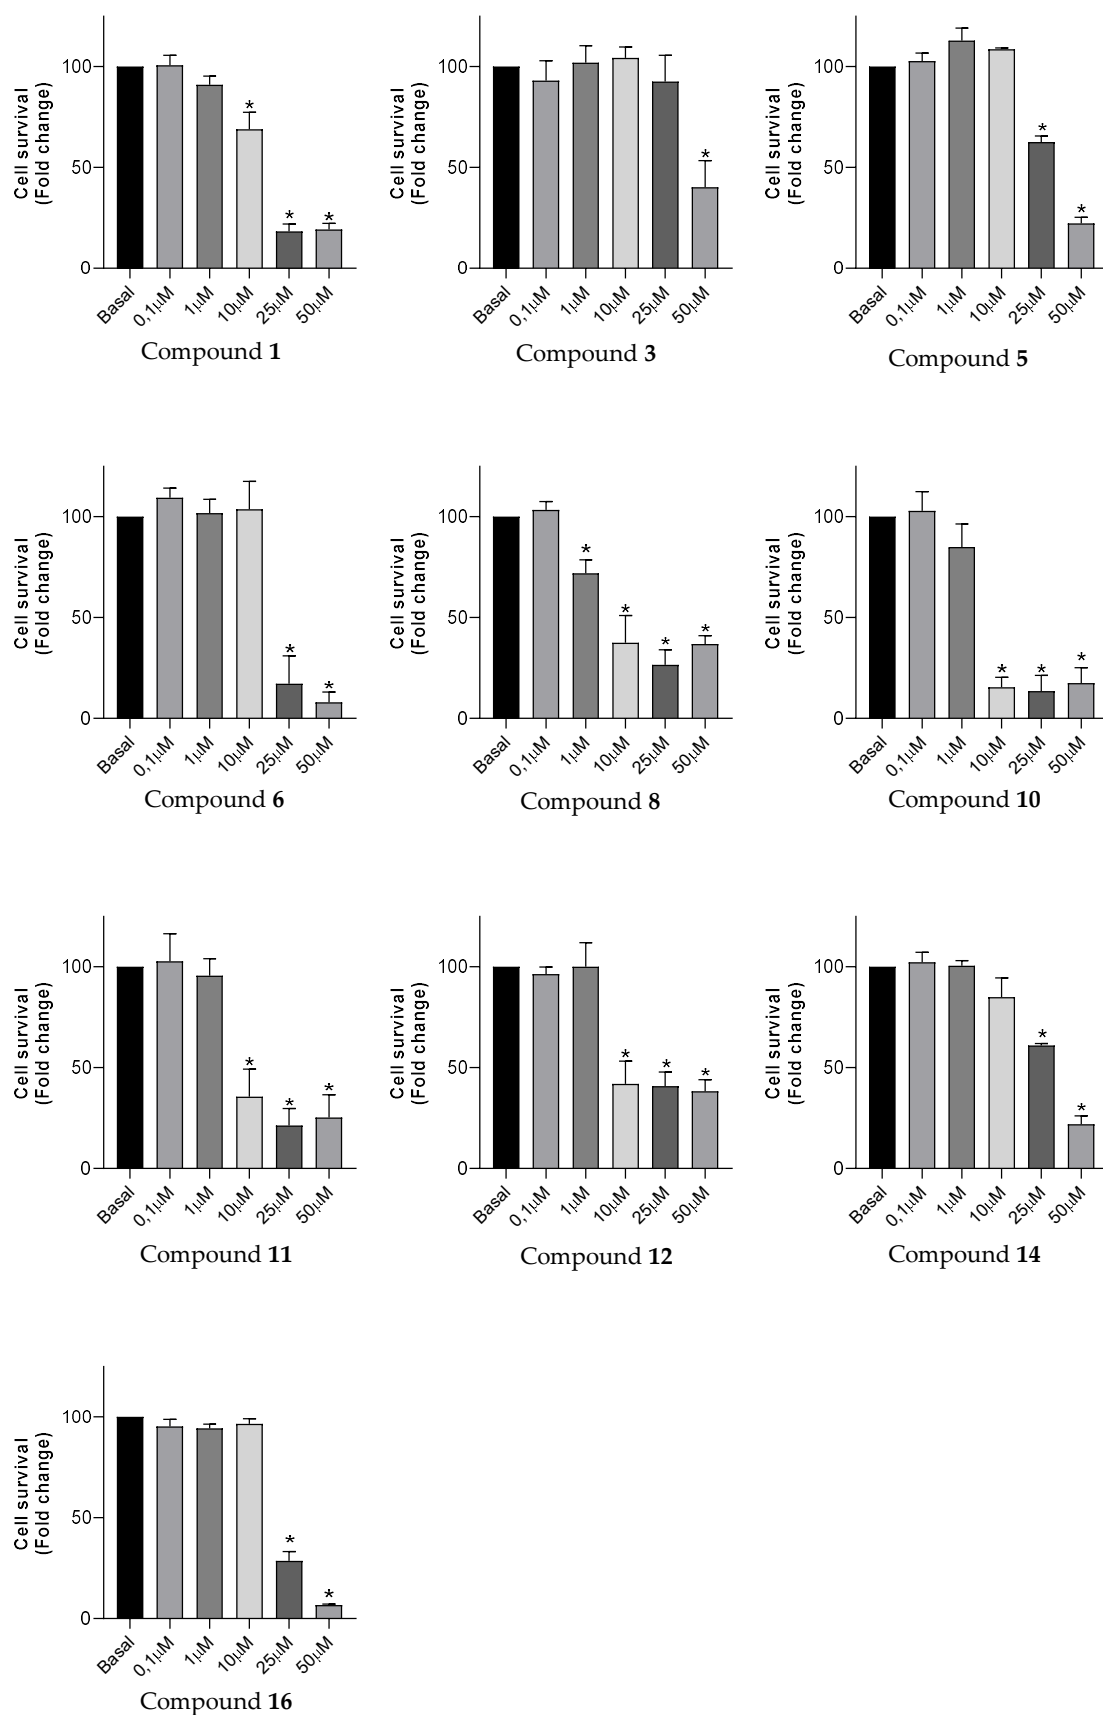

Figure S32. Dose-response cell viability of RAW 264.7 cells was determined by crystal violet assay. The results are mean  $\pm$  SD ( $n \geq 3$  independent experiments performed in duplicate). Significant differences were determined by two way ANOVA followed by Bonferroni t-test  $*p \leq 0.05$  vs Basal.
